# Supplementary material for: Structurally diverse biflavonoids from Dysosma versipellis and their bioactivity
Source: Royal Society of Chemistry journal article supplement (doi:10.1039/d2ra06961j), 2022-01-01
Supplement: d2ra06961j1.pdf [file d2ra06961j1.pdf]

## Structurally diverse biflavonoids from *Dysosma versipellis* and their bioactivity

Yan-Jun Sun,<sup>\*a,b,c</sup> Rui-Jie Han,<sup>a,b</sup> Hong-Yun Bai,<sup>a,b</sup> Hao-jie Wang,<sup>a,b</sup> Meng Li,<sup>a,b</sup> Ying-Ying Si,<sup>a,b</sup> Jun-Min Wang,<sup>a,b</sup> Jian-Hong Gong,<sup>a,b</sup> Hui Chen,<sup>a,b</sup> Wei-Sheng Feng,<sup>\*a,b</sup>

Five pairs of new biflavonoid enantiomers, ( $\pm$ )-dysosmabiflavonoids A–E (**1–5**), two new biflavonoids, dysosmabiflavonoids F–G (**6–7**), along with four biosynthetically related precursors (**8–11**) were isolated from the roots and rhizomes of *Dysosma versipellis*. Their structures were elucidated by extensive spectroscopic data, including HR-ESI-MS and 2D NMR. Their absolute configurations were determined by comparison of the calculated and experimental ECD spectra. All isolated compounds were evaluated for AChE inhibitory activity. Compounds **6** and **7** exhibited more potent inhibitory activities with IC<sub>50</sub> values of 1.42 and 0.73  $\mu$ M, respectively, than their biosynthetically related precursors kaemferol (**8**, 17.90  $\mu$ M) and quercetin (**9**, 3.96  $\mu$ M). The preliminary structure-activity relationship study indicated that the connection mode of biflavonoid subunits, oxidation degree of C ring, and 3,4-dihydroxy group of B ring were important structural factors for AChE inhibitory activity. Racemates **1–5** and their corresponding levorotatory and dextrorotatory enantiomers were tested for the potential to impede the generation of NO in lipopolysaccharide-stimulated RAW264.7 cells, and mushroom tyrosinase inhibitory effect. Racemate **1** displayed more potent mushroom tyrosinase inhibitory activity (IC<sub>50</sub>, 28.27  $\mu$ M) than the positive control kojic acid (IC<sub>50</sub>, 32.59  $\mu$ M). *D. versipellis* may have the therapeutic potential for melanogenesis disorders and neurodegenerative disease.

---

<sup>a</sup>Co-construction Collaborative Innovation Center for Chinese Medicine and Respiratory Diseases by Henan & Education Ministry of P. R. China, Henan University of Chinese Medicine, Zhengzhou 450046, P. R. China. E-mails: [sunyanjunily@126.com](mailto:sunyanjunily@126.com); [fwsh@hactcm.edu.cn](mailto:fwsh@hactcm.edu.cn)

<sup>b</sup>School of Pharmacy, Henan University of Chinese Medicine, Zhengzhou 450046, P. R. China

<sup>c</sup>Henan Research Center for Special Processing Technology of Chinese Medicine, Zhengzhou, 450046, P. R. China

## Table of Contents

|                                                                                                     |    |
|-----------------------------------------------------------------------------------------------------|----|
| <b>Figure S1.</b> $^1\text{H}$ NMR (500 MHz, DMSO- $d_6$ ) spectrum of ( $\pm$ ) <b>1</b> .....     | 4  |
| <b>Figure S2.</b> $^{13}\text{C}$ NMR (125 MHz, DMSO- $d_6$ ) spectrum of ( $\pm$ ) <b>1</b> .....  | 4  |
| <b>Figure S3.</b> HSQC spectrum of ( $\pm$ ) <b>1</b> .....                                         | 5  |
| <b>Figure S4.</b> HMBC spectrum of ( $\pm$ ) <b>1</b> .....                                         | 5  |
| <b>Figure S5.</b> HR-ESI-MS spectrum of ( $\pm$ ) <b>1</b> .....                                    | 6  |
| <b>Figure S6.</b> IR spectrum of ( $\pm$ ) <b>1</b> .....                                           | 6  |
| <b>Figure S7.</b> UV spectrum of ( $\pm$ ) <b>1</b> .....                                           | 7  |
| <b>Figure S8.</b> Experimental ECD spectrum of <b>1a</b> .....                                      | 7  |
| <b>Figure S9.</b> Experimental ECD spectrum of <b>1b</b> .....                                      | 8  |
| <b>Figure S10.</b> $^1\text{H}$ NMR (500 MHz, DMSO- $d_6$ ) spectrum of ( $\pm$ ) <b>2</b> .....    | 8  |
| <b>Figure S11.</b> $^{13}\text{C}$ NMR (125 MHz, DMSO- $d_6$ ) spectrum of ( $\pm$ ) <b>2</b> ..... | 9  |
| <b>Figure S12.</b> HSQC spectrum of ( $\pm$ ) <b>2</b> .....                                        | 9  |
| <b>Figure S13.</b> HMBC spectrum of ( $\pm$ ) <b>2</b> .....                                        | 10 |
| <b>Figure S14.</b> HR-ESI-MS spectrum of ( $\pm$ ) <b>2</b> .....                                   | 10 |
| <b>Figure S15.</b> IR spectrum of ( $\pm$ ) <b>2</b> .....                                          | 11 |
| <b>Figure S16.</b> UV spectrum of ( $\pm$ ) <b>2</b> .....                                          | 11 |
| <b>Figure S17.</b> Experimental ECD spectrum of <b>2a</b> .....                                     | 12 |
| <b>Figure S18.</b> Experimental ECD spectrum of <b>2b</b> .....                                     | 12 |
| <b>Figure S19.</b> $^1\text{H}$ NMR (500 MHz, DMSO- $d_6$ ) spectrum of ( $\pm$ ) <b>3</b> .....    | 13 |
| <b>Figure S20.</b> $^{13}\text{C}$ NMR (125 MHz, DMSO- $d_6$ ) spectrum of ( $\pm$ ) <b>3</b> ..... | 13 |
| <b>Figure S21.</b> HSQC spectrum of ( $\pm$ ) <b>3</b> .....                                        | 14 |
| <b>Figure S22.</b> HMBC spectrum of ( $\pm$ ) <b>3</b> .....                                        | 14 |
| <b>Figure S23.</b> HR-ESI-MS spectrum of ( $\pm$ ) <b>3</b> .....                                   | 15 |
| <b>Figure S24.</b> IR spectrum of ( $\pm$ ) <b>3</b> .....                                          | 15 |
| <b>Figure S25.</b> UV spectrum of ( $\pm$ ) <b>3</b> .....                                          | 16 |
| <b>Figure S26.</b> Experimental ECD spectrum of <b>3a</b> .....                                     | 16 |
| <b>Figure S27.</b> Experimental ECD spectrum of <b>3b</b> .....                                     | 17 |
| <b>Figure S28.</b> $^1\text{H}$ NMR (500 MHz, DMSO- $d_6$ ) spectrum of ( $\pm$ ) <b>4</b> .....    | 17 |
| <b>Figure S29.</b> $^{13}\text{C}$ NMR (125 MHz, DMSO- $d_6$ ) spectrum of ( $\pm$ ) <b>4</b> ..... | 18 |
| <b>Figure S30.</b> HSQC spectrum of ( $\pm$ ) <b>4</b> .....                                        | 18 |
| <b>Figure S31.</b> HMBC spectrum of ( $\pm$ ) <b>4</b> .....                                        | 19 |
| <b>Figure S32.</b> HR-ESI-MS spectrum of ( $\pm$ ) <b>4</b> .....                                   | 19 |
| <b>Figure S33.</b> IR spectrum of ( $\pm$ ) <b>4</b> .....                                          | 20 |
| <b>Figure S34.</b> UV spectrum of ( $\pm$ ) <b>4</b> .....                                          | 20 |
| <b>Figure S35.</b> Experimental ECD spectrum of <b>4a</b> .....                                     | 21 |
| <b>Figure S36.</b> Experimental ECD spectrum of <b>4b</b> .....                                     | 21 |
| <b>Figure S37.</b> $^1\text{H}$ NMR (500 MHz, DMSO- $d_6$ ) spectrum of ( $\pm$ ) <b>5</b> .....    | 22 |
| <b>Figure S38.</b> $^{13}\text{C}$ NMR (125 MHz, DMSO- $d_6$ ) spectrum of ( $\pm$ ) <b>5</b> ..... | 22 |
| <b>Figure S39.</b> HSQC spectrum of ( $\pm$ ) <b>5</b> .....                                        | 23 |
| <b>Figure S40.</b> HMBC spectrum of ( $\pm$ ) <b>5</b> .....                                        | 23 |
| <b>Figure S41.</b> HR-ESI-MS spectrum of ( $\pm$ ) <b>5</b> .....                                   | 24 |
| <b>Figure S42.</b> IR spectrum of ( $\pm$ ) <b>5</b> .....                                          | 24 |
| <b>Figure S43.</b> UV spectrum of ( $\pm$ ) <b>5</b> .....                                          | 25 |
| <b>Figure S44.</b> Experimental ECD spectrum of <b>5a</b> .....                                     | 25 |

|                                                                                                               |    |
|---------------------------------------------------------------------------------------------------------------|----|
| <b>Figure S45.</b> Experimental ECD spectrum of <b>5b</b> . . . . .                                           | 26 |
| <b>Figure S46.</b> <sup>1</sup> H NMR (500 MHz, DMSO- <i>d</i> <sub>6</sub> ) spectrum of <b>6</b> . . . . .  | 26 |
| <b>Figure S47.</b> <sup>13</sup> C NMR (125 MHz, DMSO- <i>d</i> <sub>6</sub> ) spectrum of <b>6</b> . . . . . | 27 |
| <b>Figure S48.</b> HSQC spectrum of <b>6</b> . . . . .                                                        | 27 |
| <b>Figure S49.</b> HMBC spectrum of <b>6</b> . . . . .                                                        | 28 |
| <b>Figure S50.</b> HR-ESI-MS spectrum of <b>6</b> . . . . .                                                   | 28 |
| <b>Figure S51.</b> IR spectrum of <b>6</b> . . . . .                                                          | 29 |
| <b>Figure S52.</b> UV spectrum of <b>6</b> . . . . .                                                          | 29 |
| <b>Figure S53.</b> <sup>1</sup> H NMR (500 MHz, DMSO- <i>d</i> <sub>6</sub> ) spectrum of <b>7</b> . . . . .  | 30 |
| <b>Figure S54.</b> <sup>13</sup> C NMR (125 MHz, DMSO- <i>d</i> <sub>6</sub> ) spectrum of <b>7</b> . . . . . | 30 |
| <b>Figure S55.</b> HSQC spectrum of <b>7</b> . . . . .                                                        | 31 |
| <b>Figure S56.</b> HMBC spectrum of <b>7</b> . . . . .                                                        | 31 |
| <b>Figure S57.</b> HR-ESI-MS spectrum of <b>7</b> . . . . .                                                   | 32 |
| <b>Figure S58.</b> IR spectrum of <b>7</b> . . . . .                                                          | 32 |
| <b>Figure S59.</b> UV spectrum of <b>7</b> . . . . .                                                          | 33 |

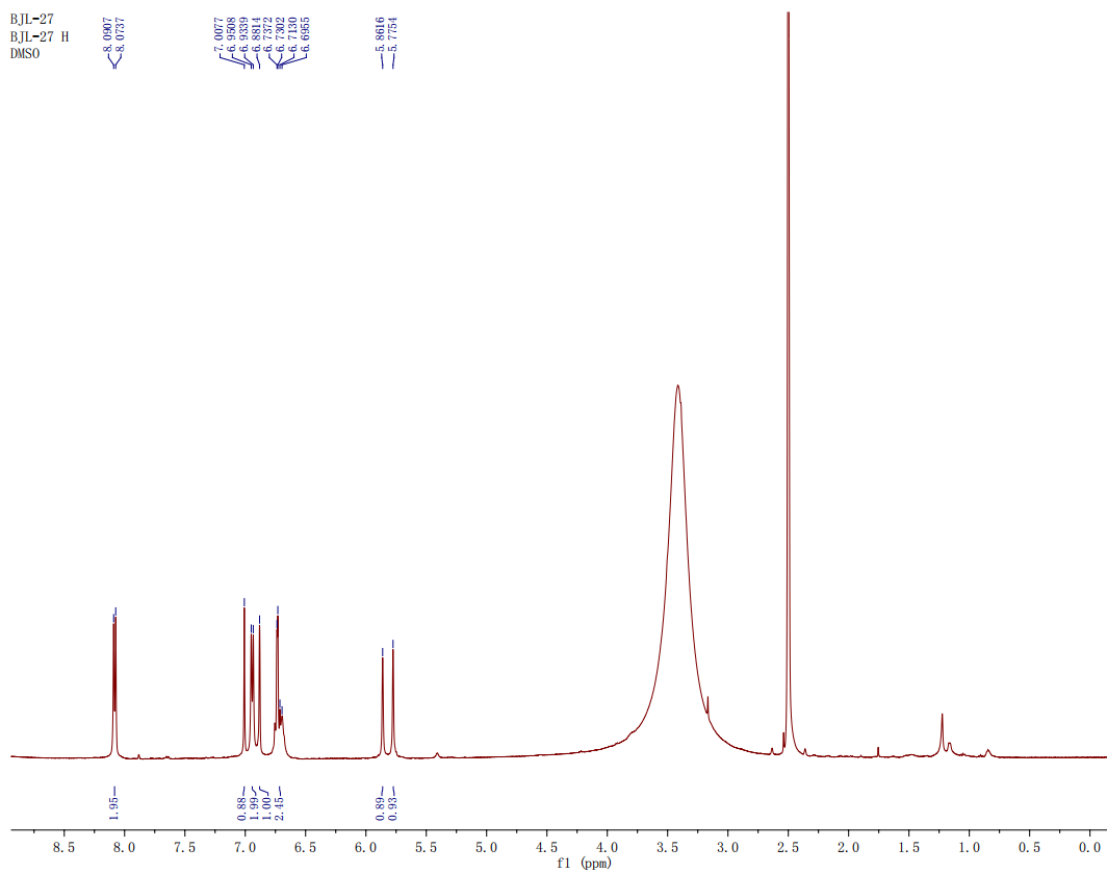

**Figure S1.**  $^1\text{H}$  NMR (500 MHz,  $\text{DMSO-}d_6$ ) spectrum of ( $\pm$ ) **1**

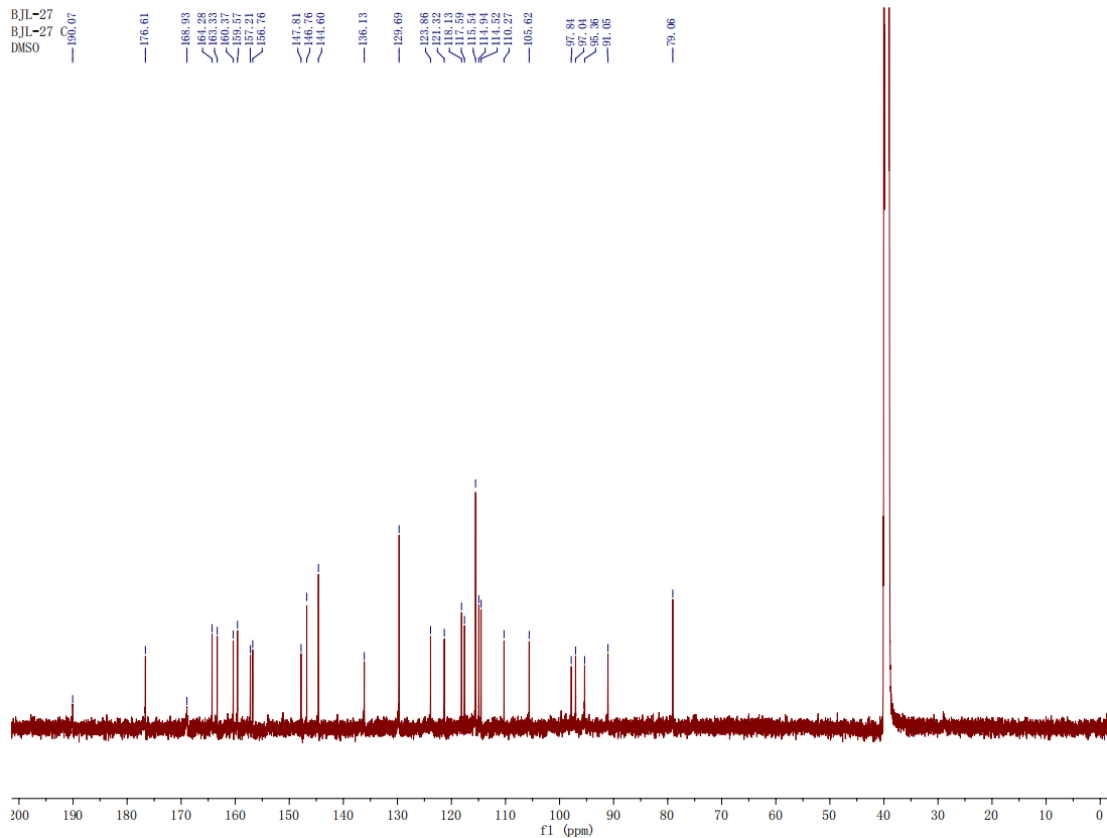

**Figure S2.**  $^{13}\text{C}$  NMR (125 MHz,  $\text{DMSO-}d_6$ ) spectrum of ( $\pm$ ) **1**

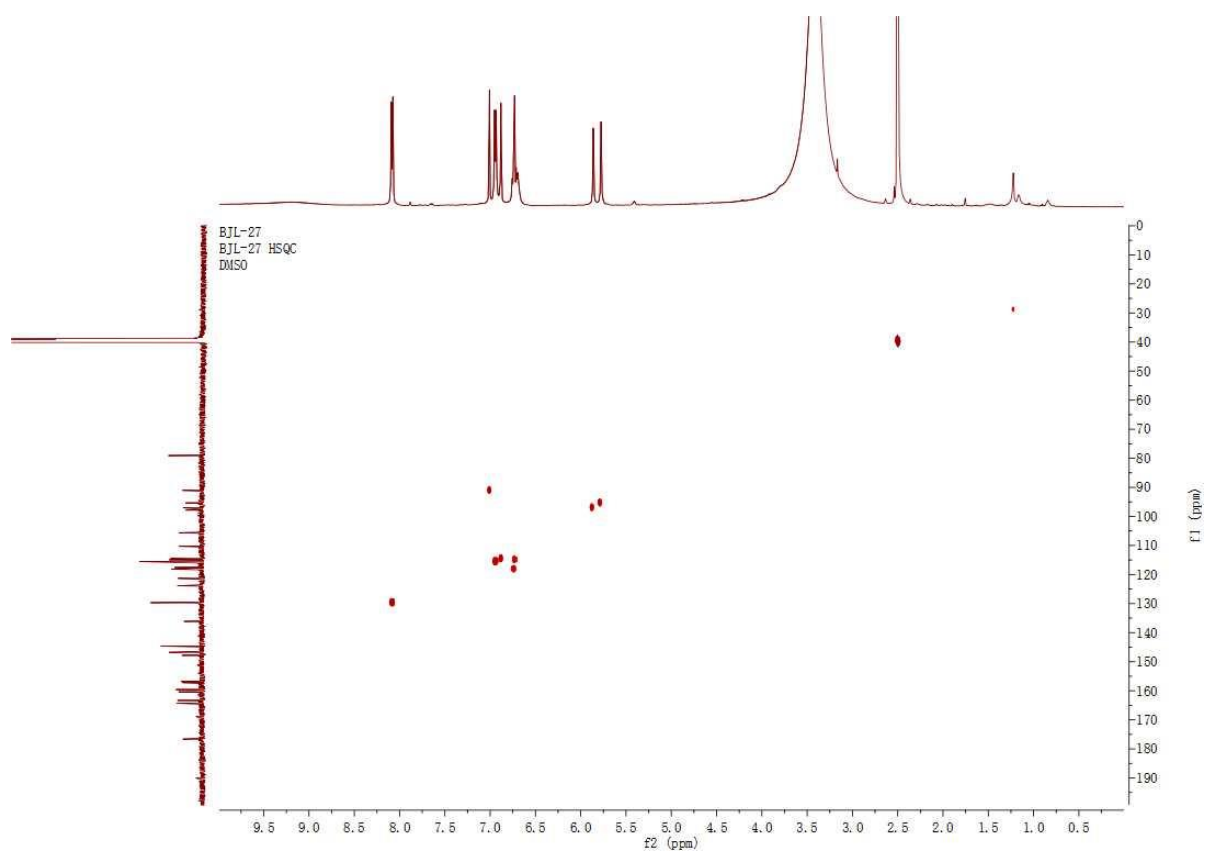

Figure S3. HSQC spectrum of ( $\pm$ ) **1**

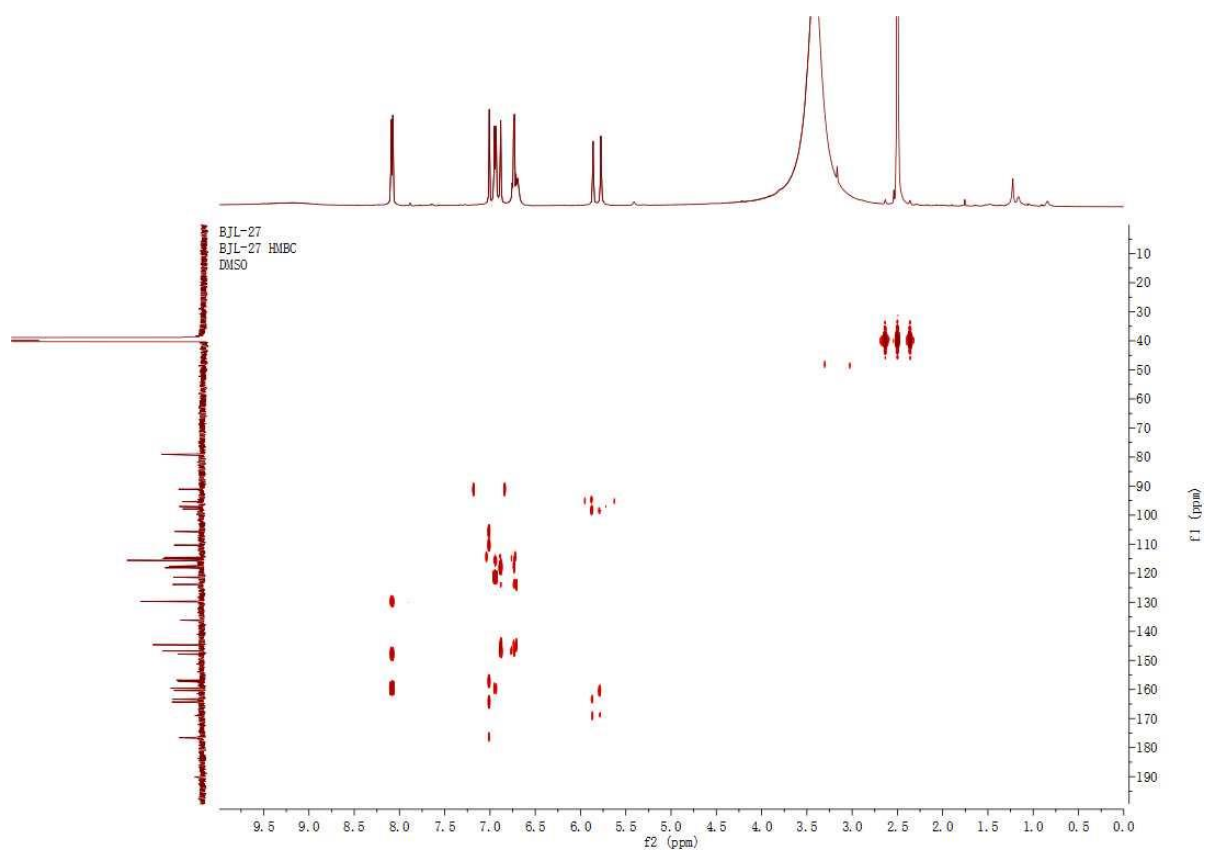

Figure S4. HMBC spectrum of ( $\pm$ ) **1**

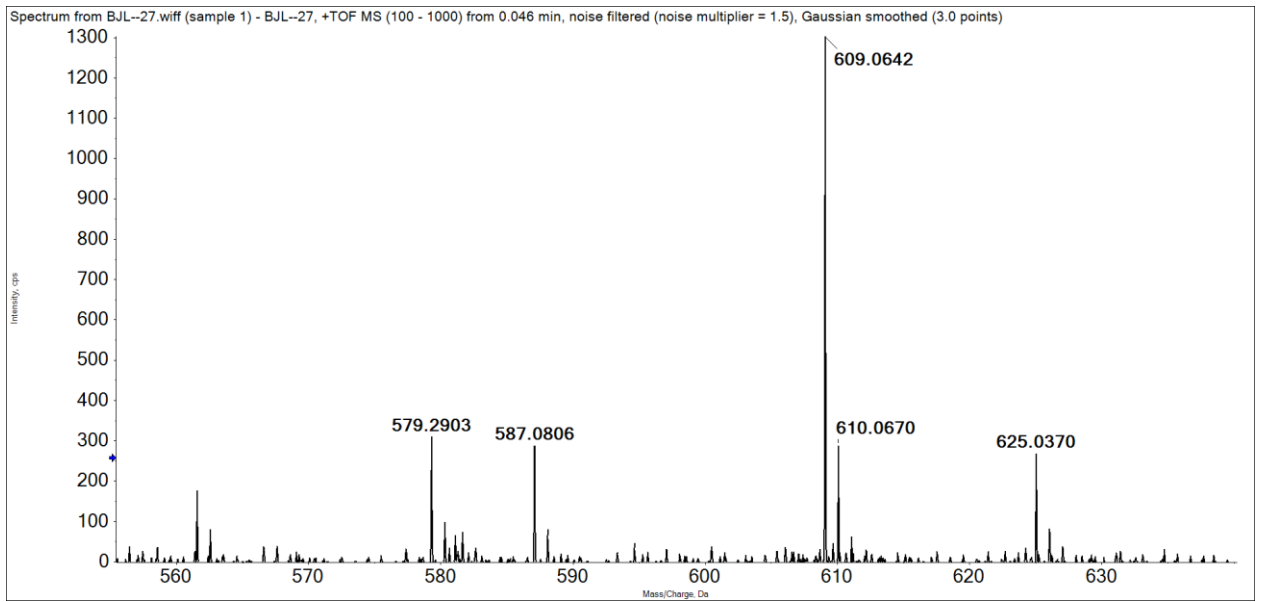

**Figure S5. HR-ESI-MS spectrum of ( $\pm$ ) 1**

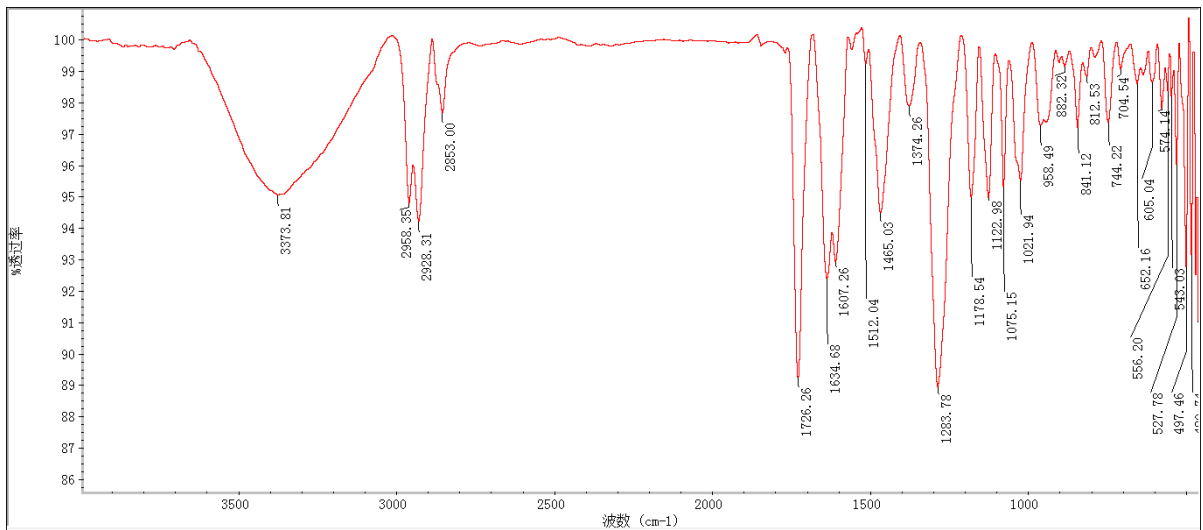

**Figure S6. IR spectrum of ( $\pm$ ) 1**

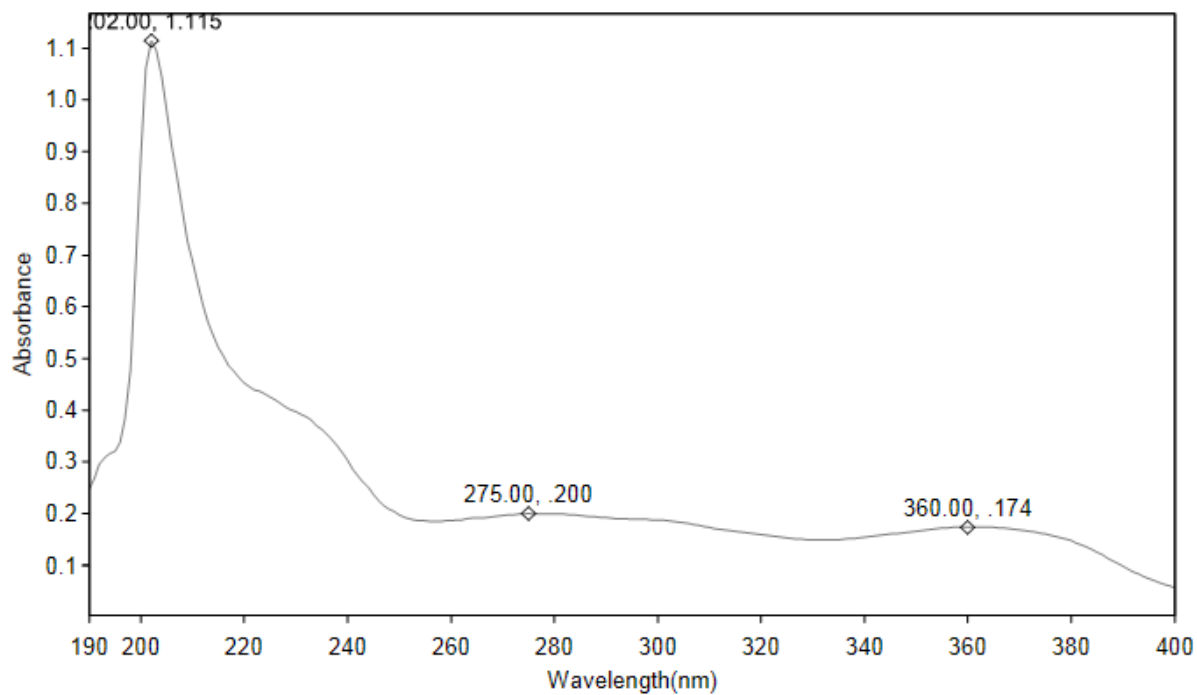

**Figure S7.** UV spectrum of ( $\pm$ ) **1**

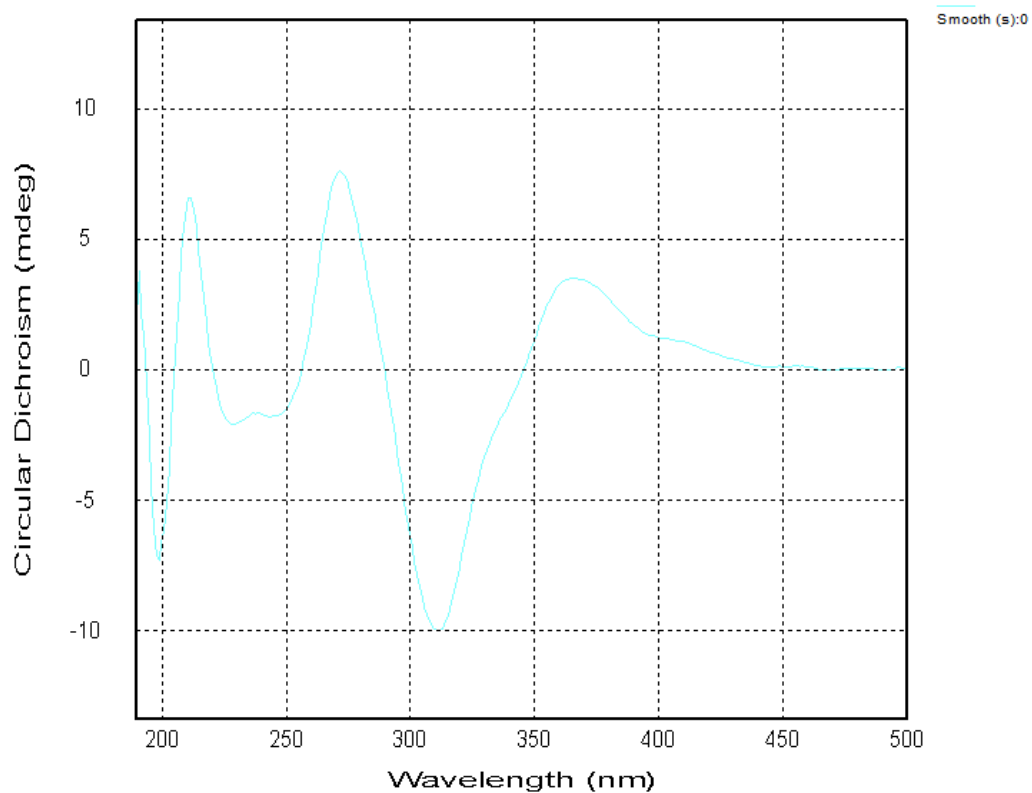

**Figure S8.** Experimental ECD spectrum of **1a**

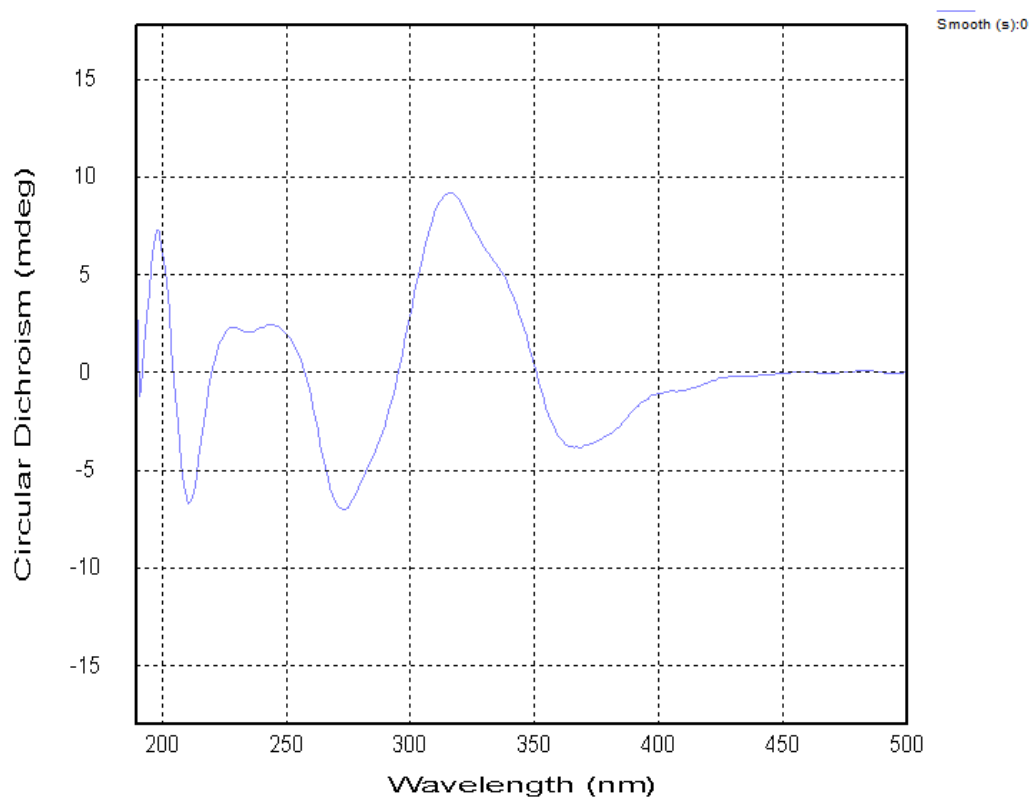

**Figure S9.** Experimental ECD spectrum of **1b**

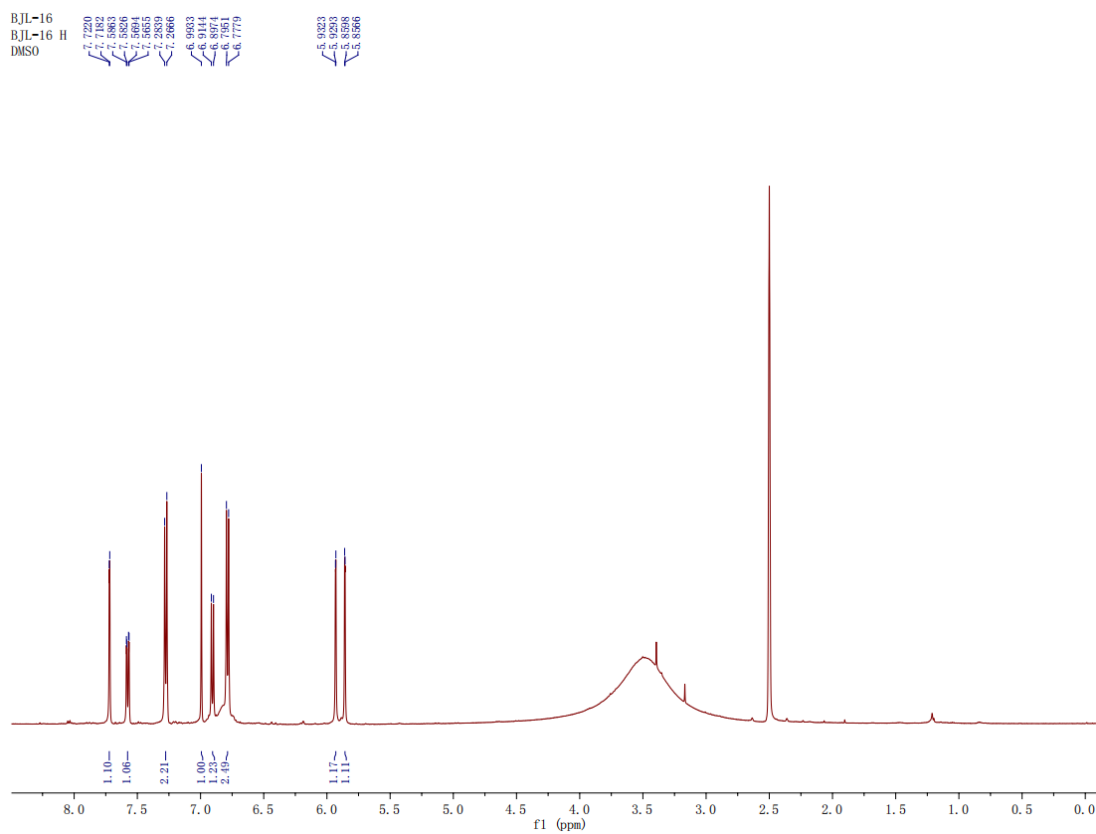

**Figure S10.**  $^1\text{H}$  NMR (500 MHz,  $\text{DMSO-}d_6$ ) spectrum of ( $\pm$ ) **2**



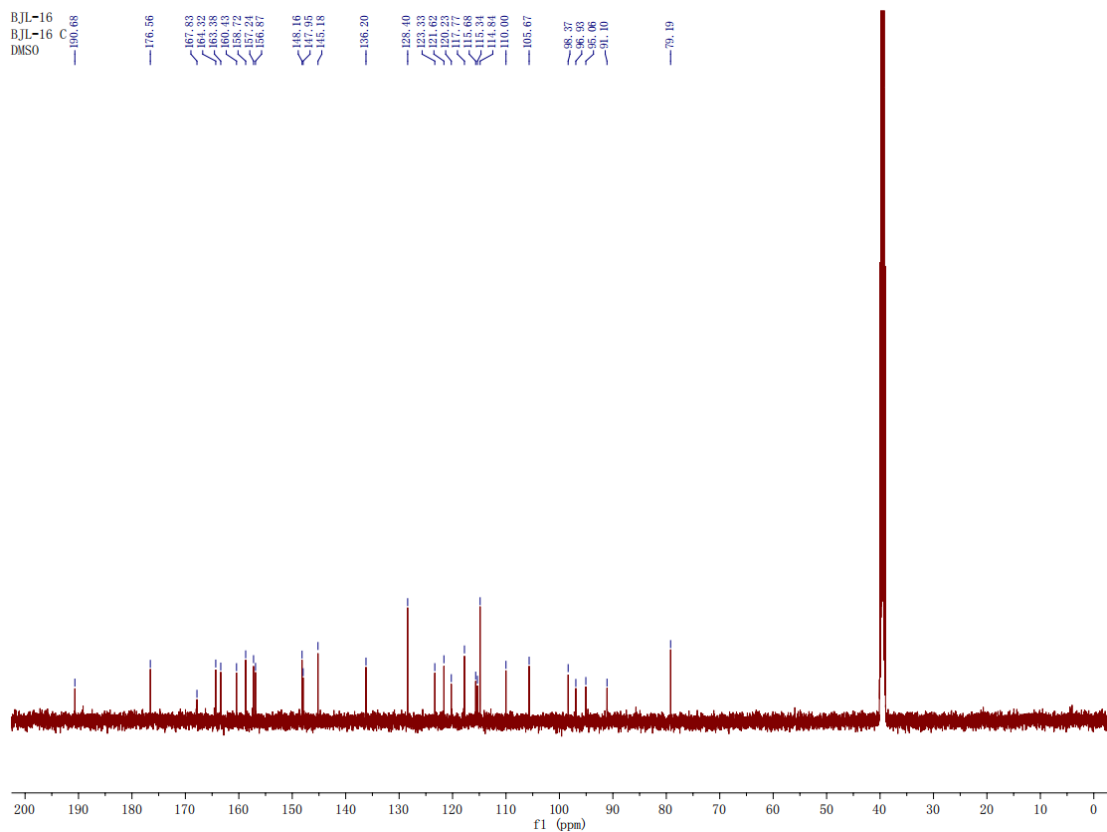

Figure S11.  $^{13}\text{C}$  NMR (125 MHz,  $\text{DMSO-}d_6$ ) spectrum of ( $\pm$ ) **2**

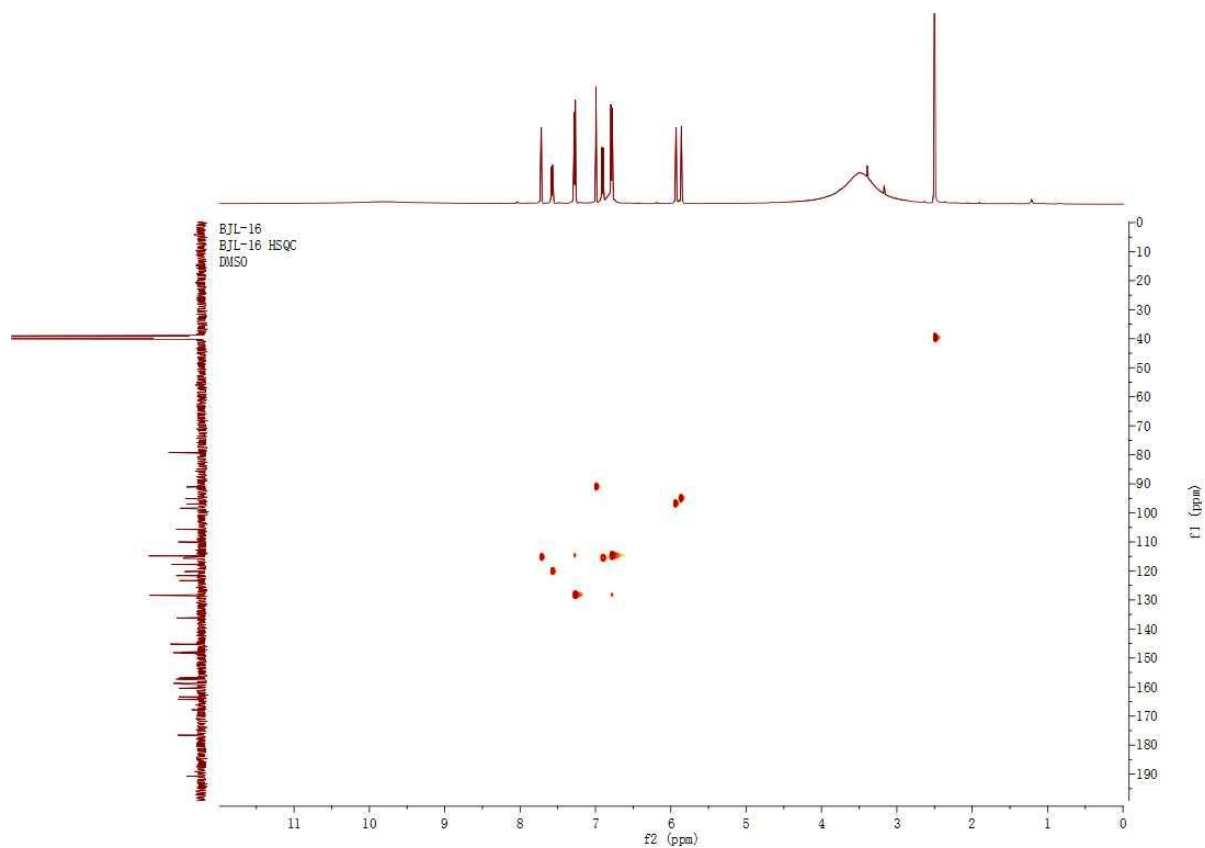

Figure S12. HSQC spectrum of ( $\pm$ ) **2**

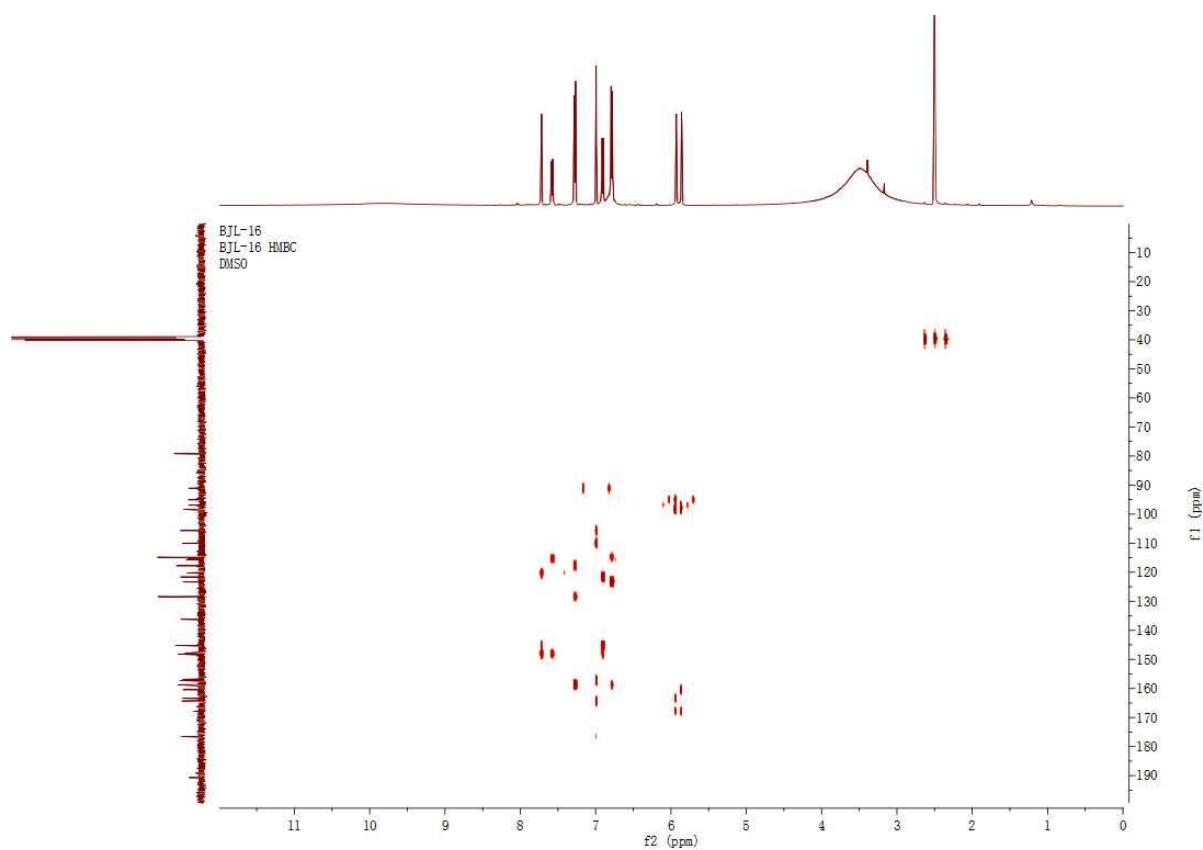

**Figure S13.** HMBC spectrum of ( $\pm$ ) **2**

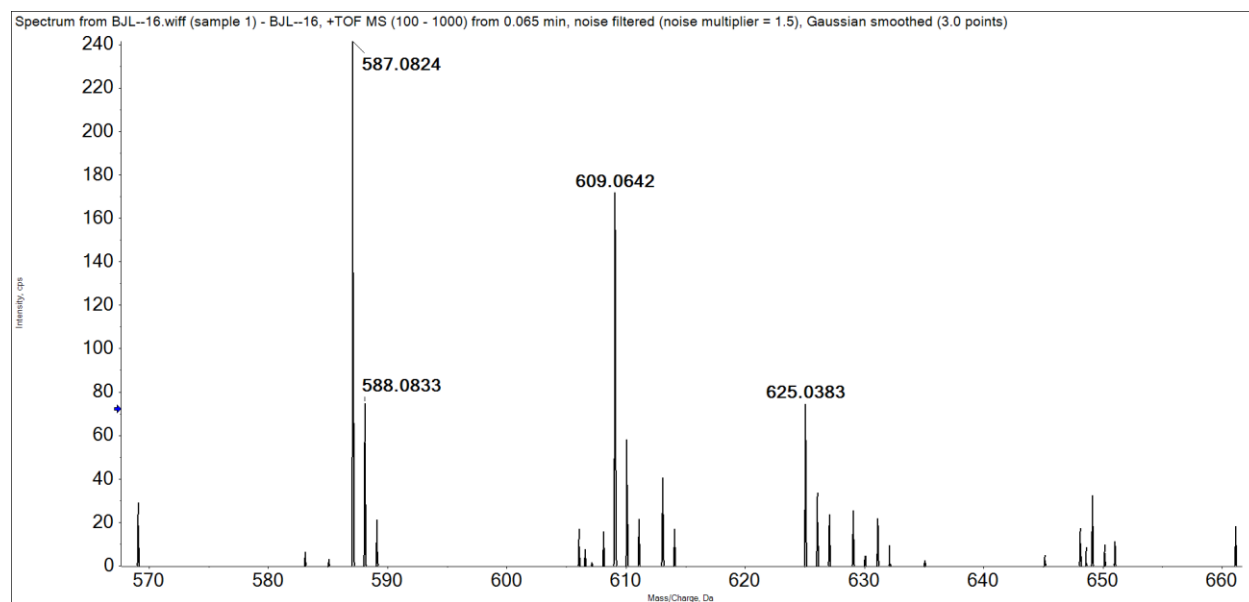

**Figure S14.** HR-ESI-MS spectrum of ( $\pm$ ) **2**

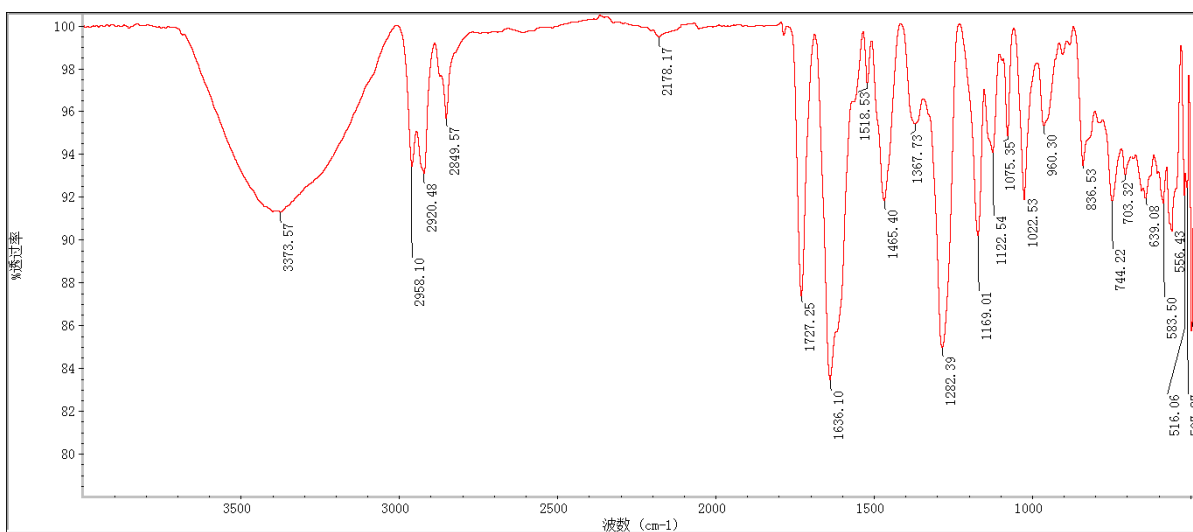

Figure S15. IR spectrum of ( $\pm$ ) **2**

Scan Graph

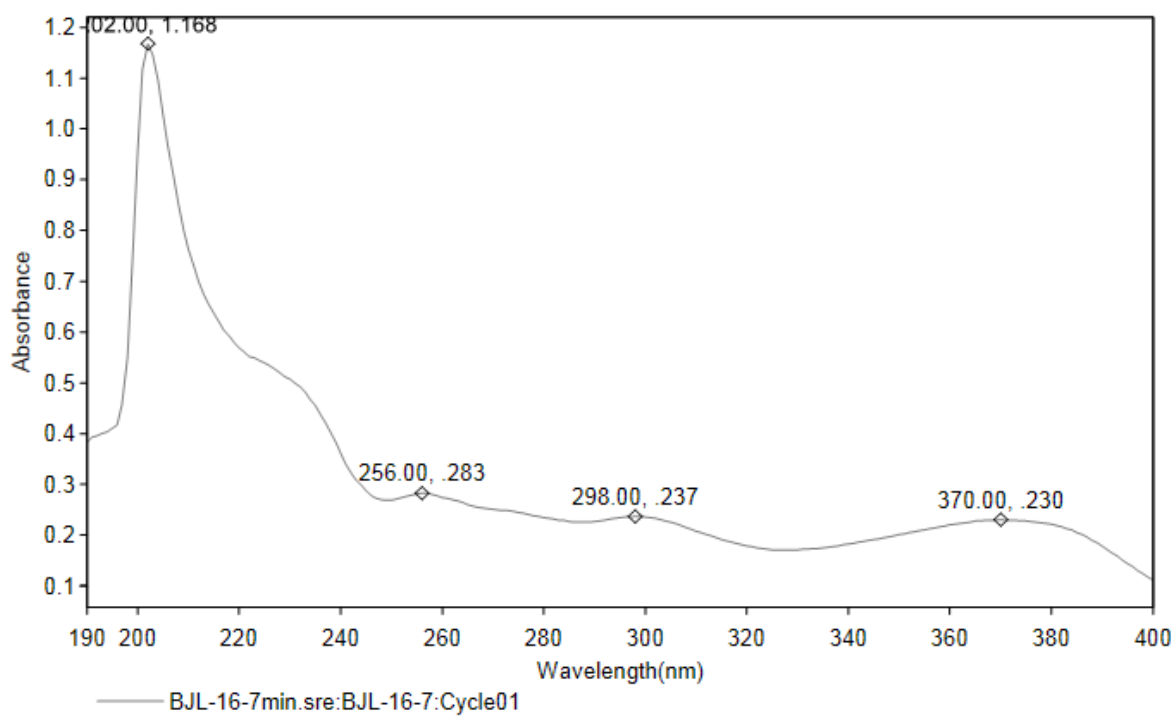

Figure S16. UV spectrum of ( $\pm$ ) **2**

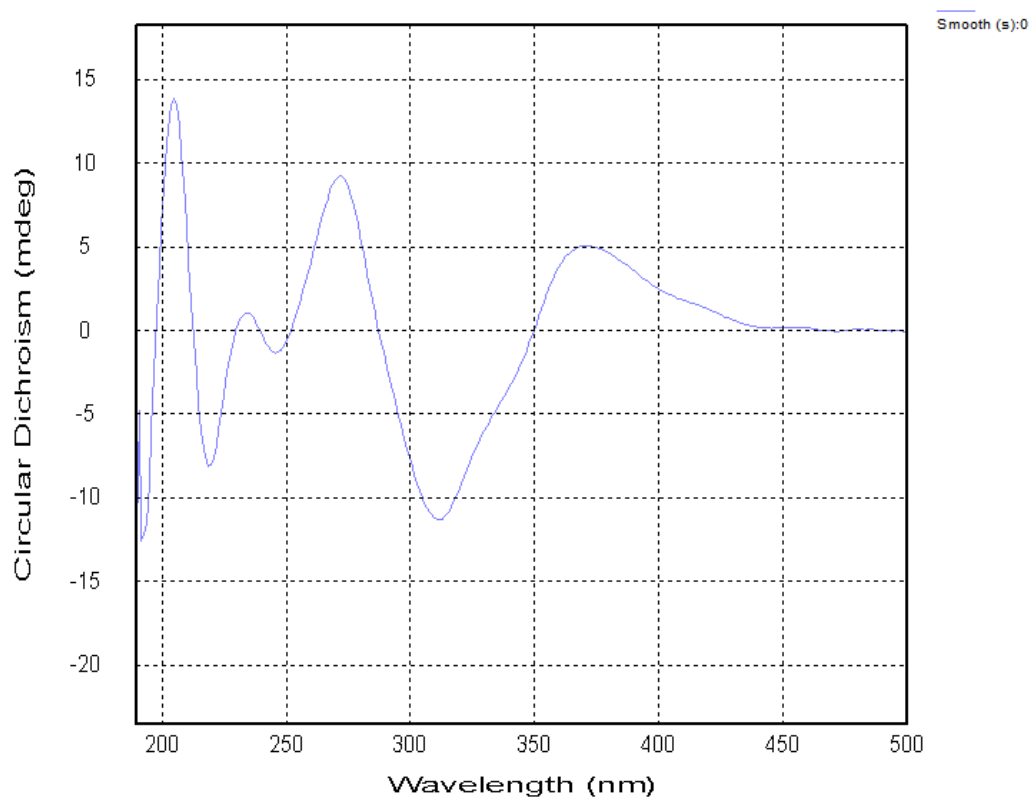

**Figure S17.** Experimental ECD spectrum of **2a**

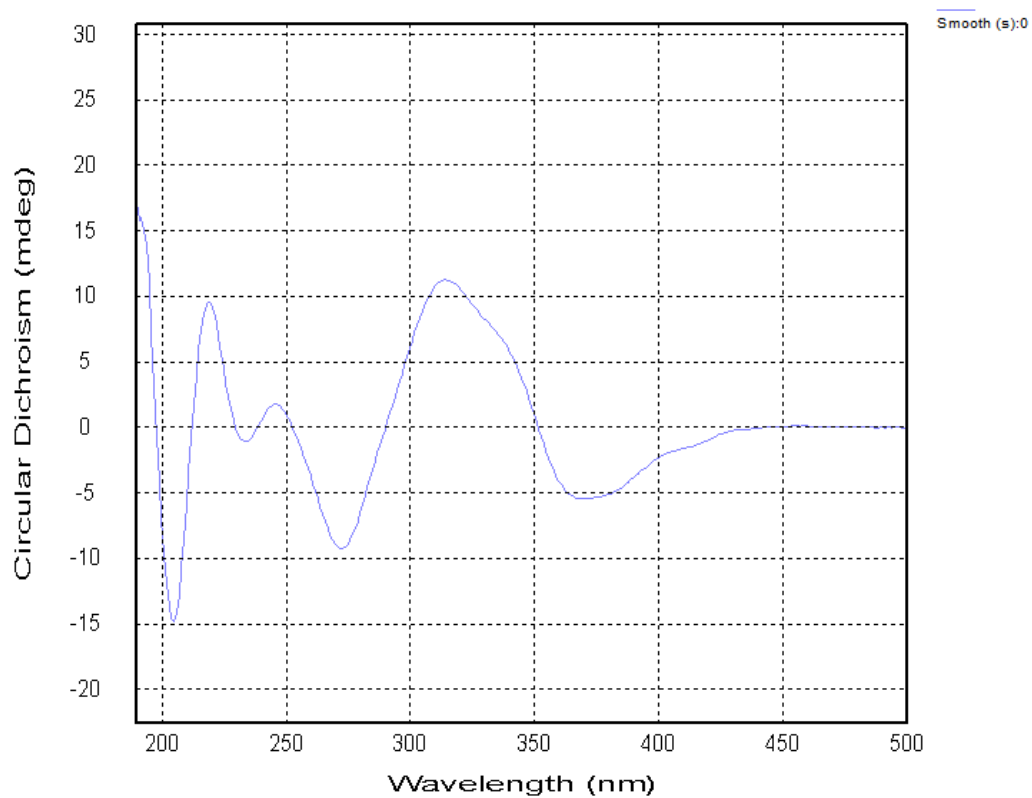

**Figure S18.** Experimental ECD spectrum of **2b**

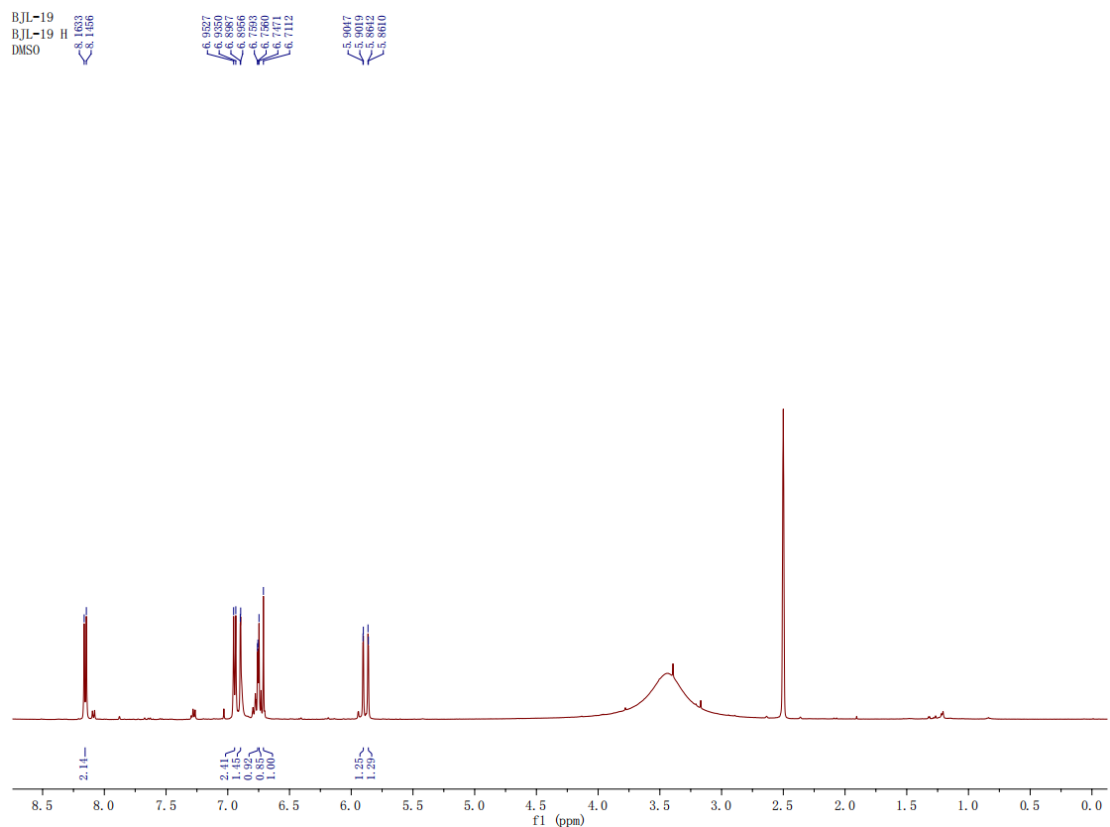

**Figure S19.**  $^1\text{H}$  NMR (500 MHz,  $\text{DMSO-}d_6$ ) spectrum of ( $\pm$ ) **3**

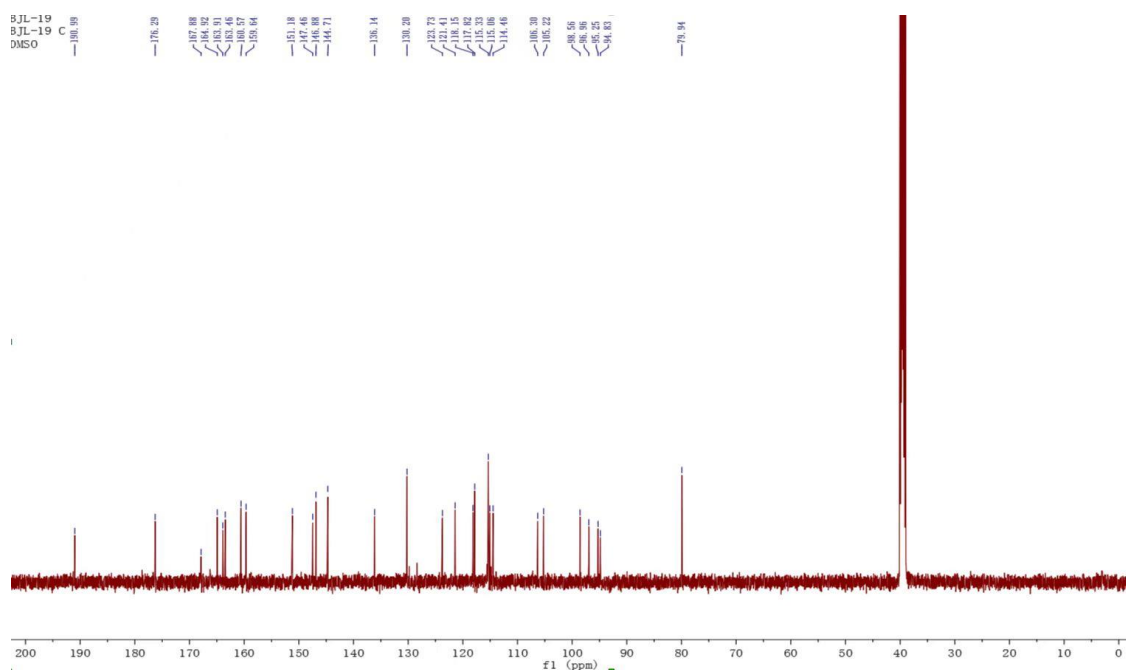

**Figure S20.**  $^{13}\text{C}$  NMR (125 MHz,  $\text{DMSO-}d_6$ ) spectrum of ( $\pm$ ) **3**

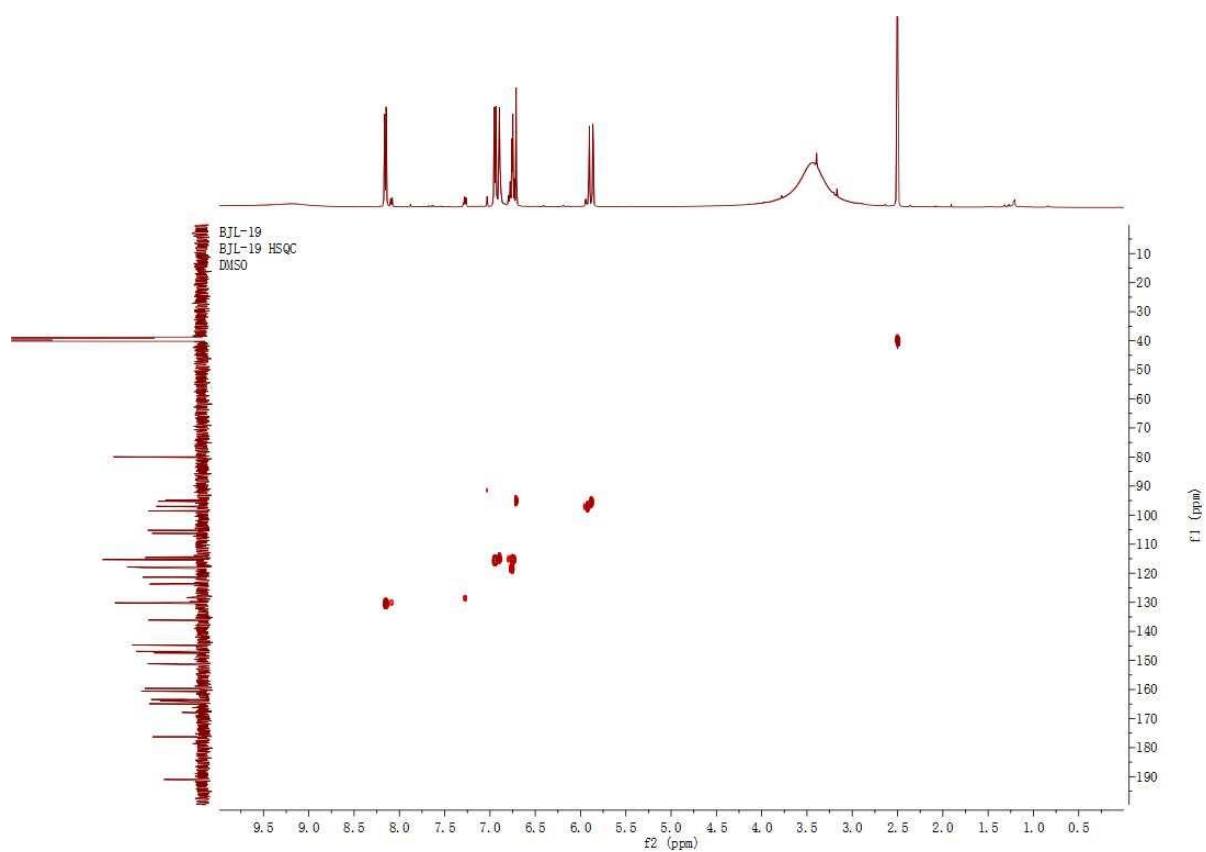

**Figure S21.** HSQC spectrum of ( $\pm$ ) **3**

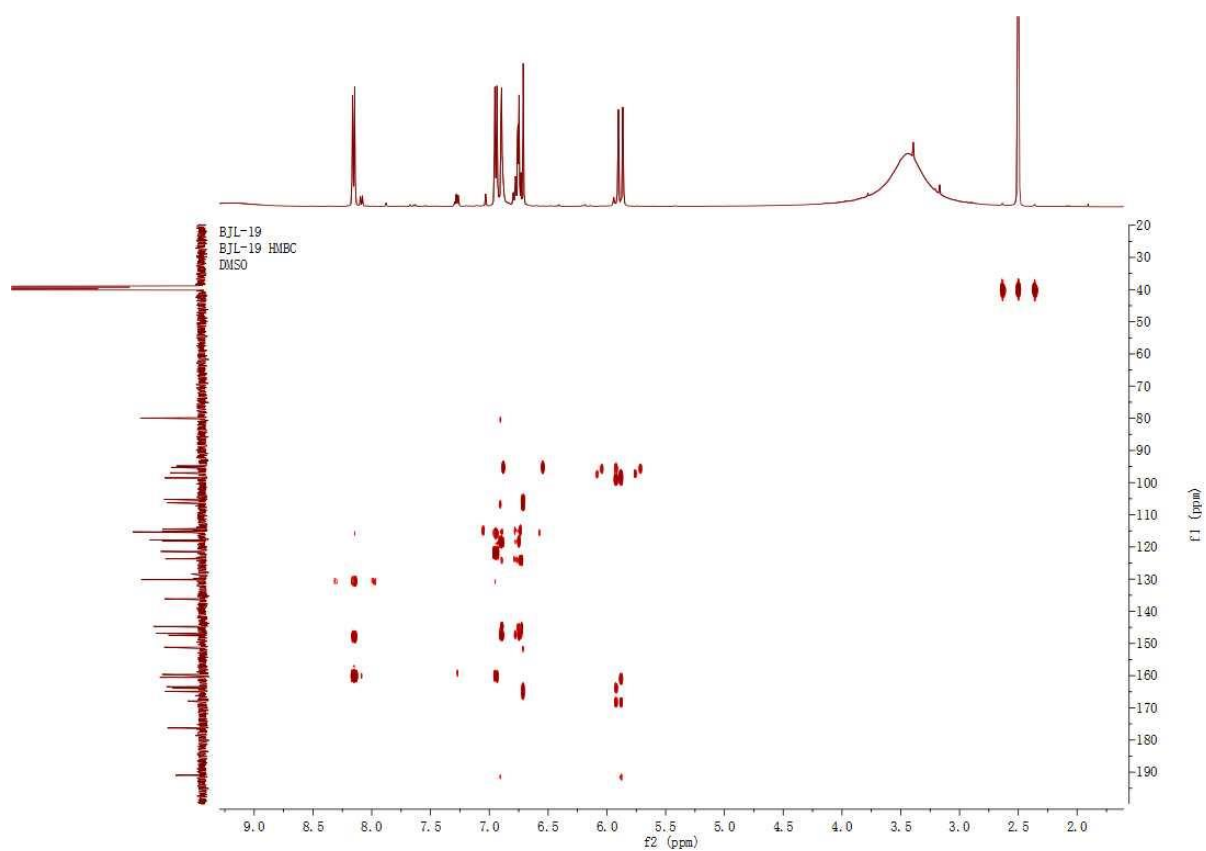

**Figure S22.** HMBC spectrum of ( $\pm$ ) **3**

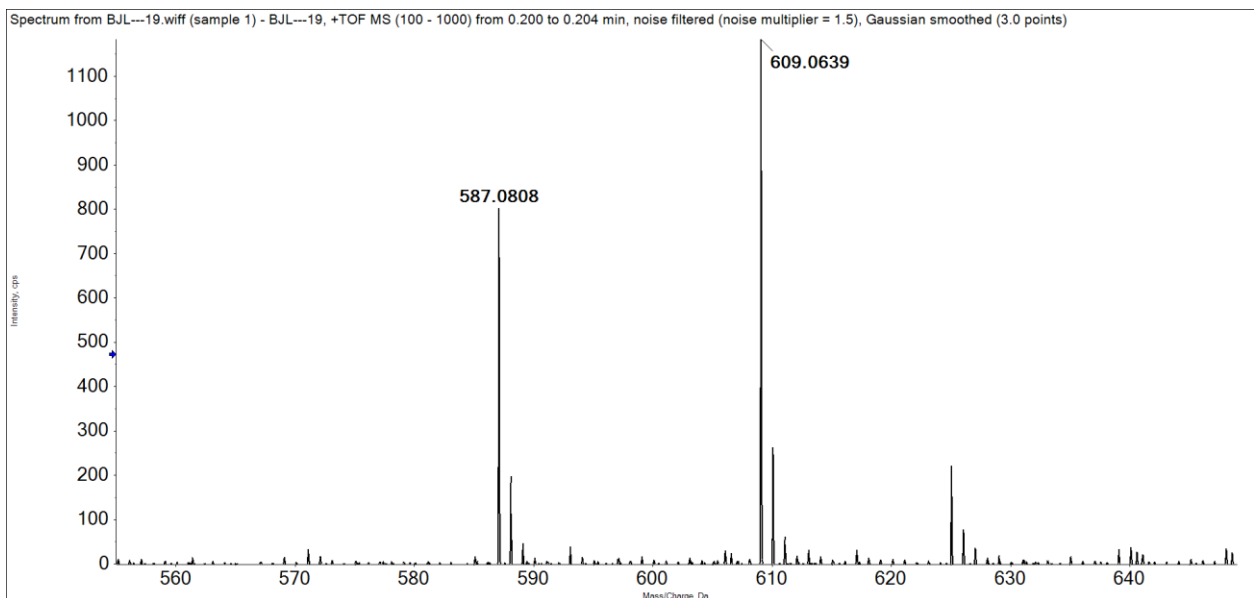

**Figure S23.** HRESIMS spectrum of ( $\pm$ ) **3**

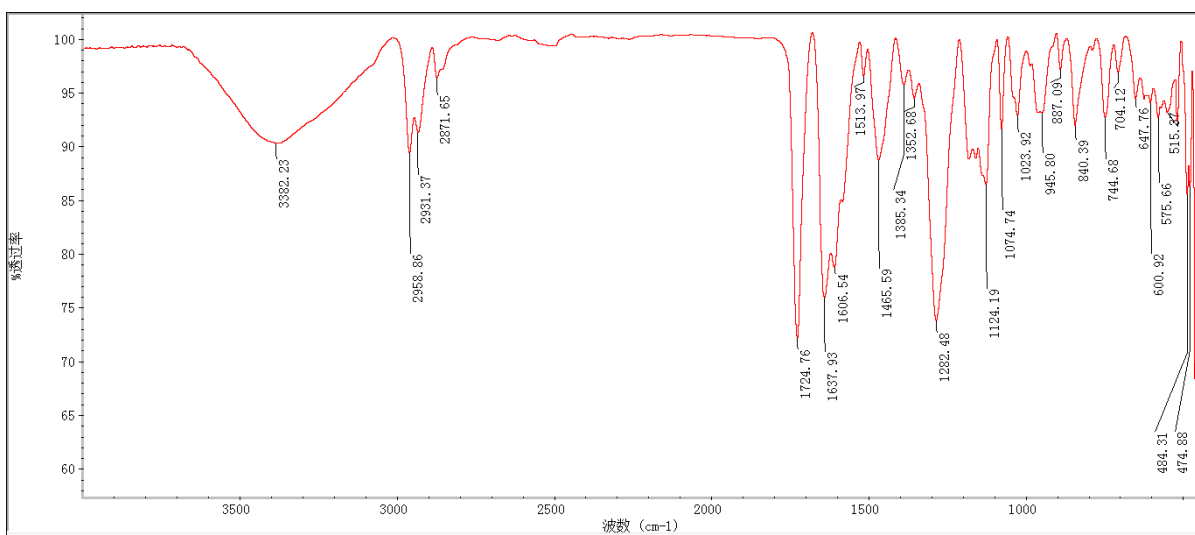

**Figure S24.** IR spectrum of ( $\pm$ ) **3**

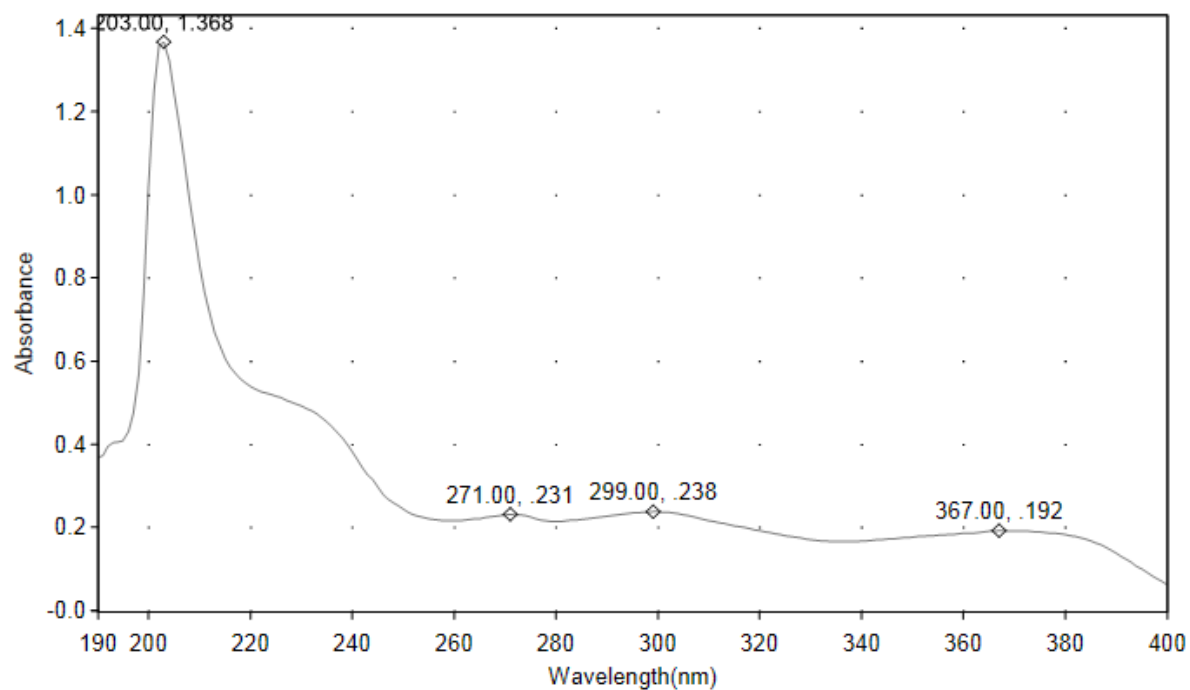

**Figure S25.** UV spectrum of ( $\pm$ ) **3**

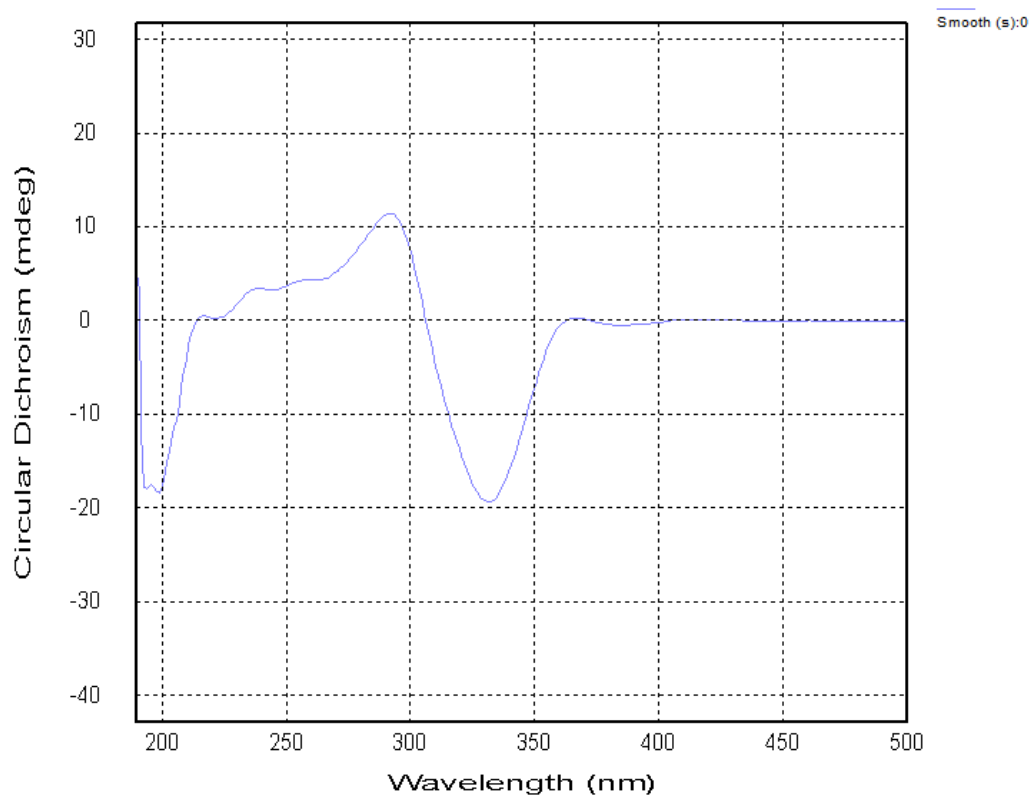

**Figure S26.** Experimental ECD spectrum of **3a**



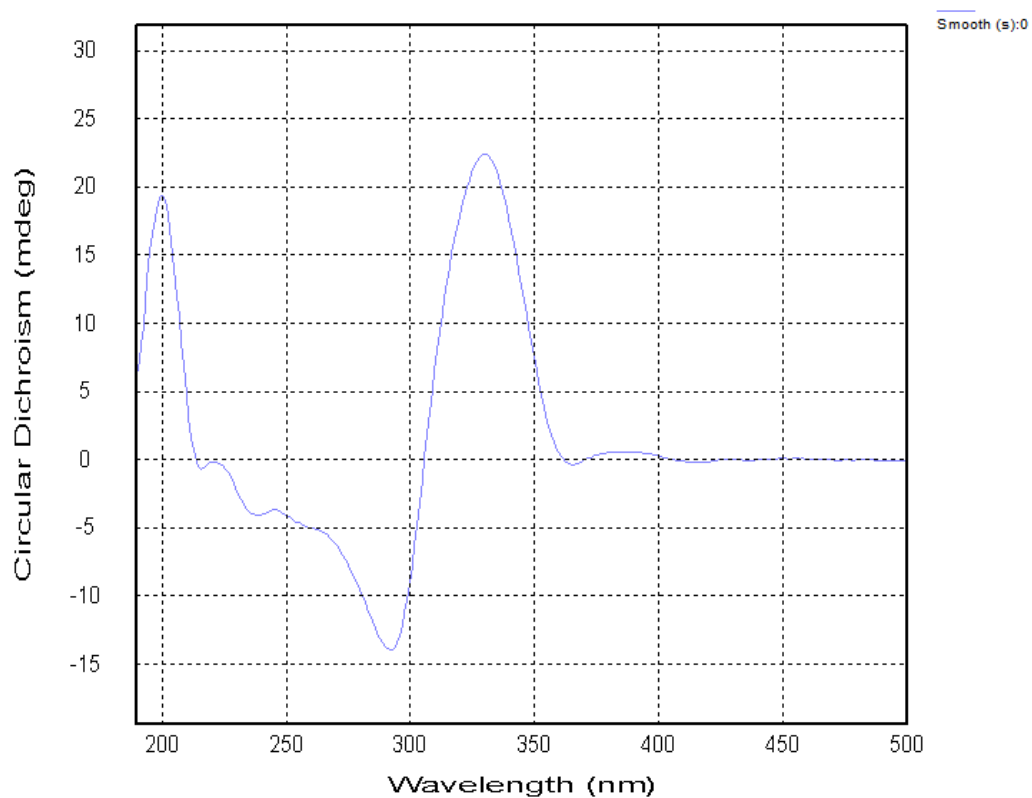

**Figure S27.** Experimental ECD spectrum of **3b**

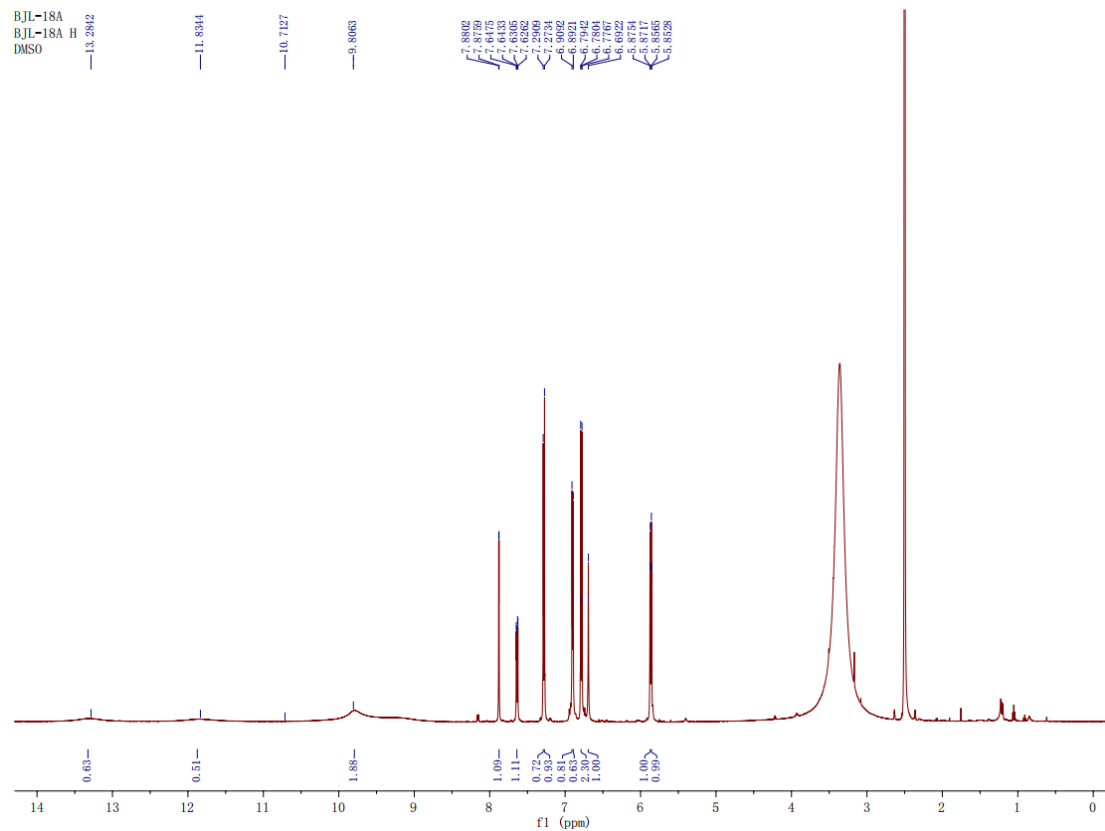

**Figure S28.**  $^1\text{H}$  NMR (500 MHz,  $\text{DMSO-}d_6$ ) spectrum of ( $\pm$ ) **4**

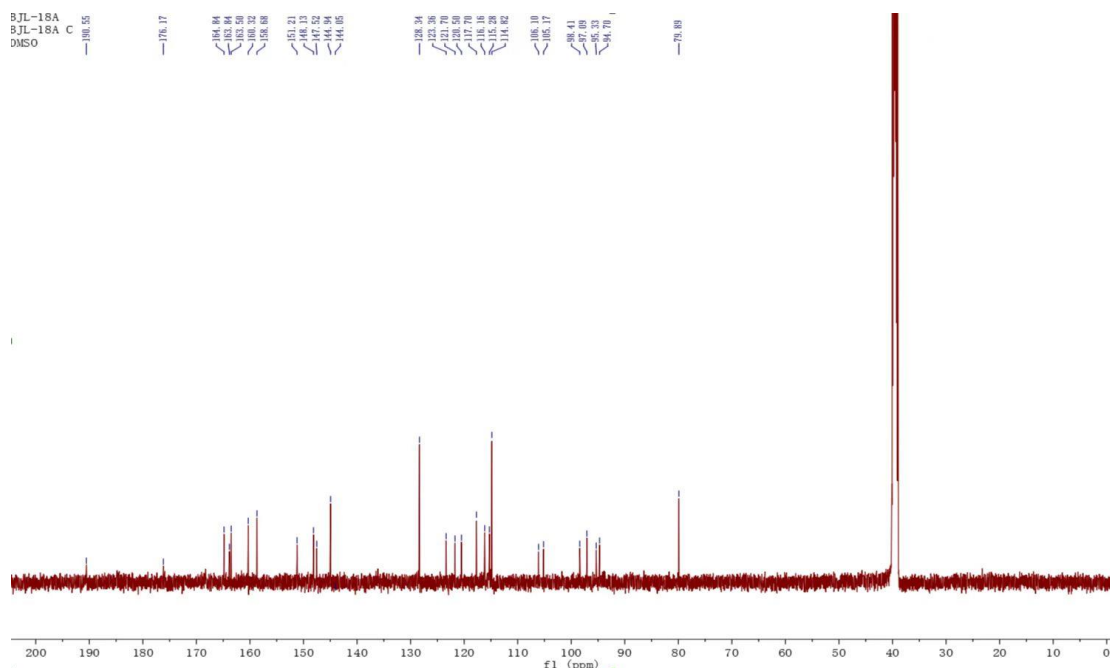

**Figure S29.**  $^{13}\text{C}$  NMR (125 MHz,  $\text{DMSO-}d_6$ ) spectrum of ( $\pm$ ) **4**

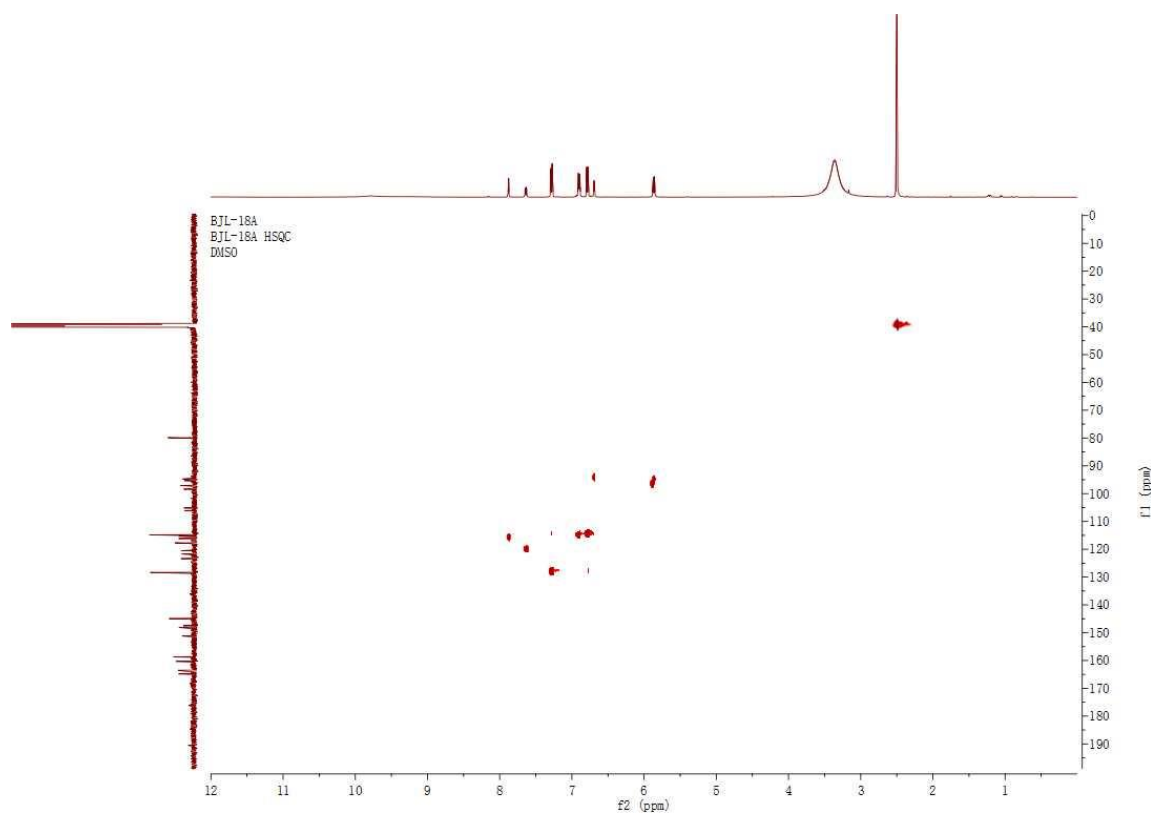

**Figure S30.** HSQC spectrum of ( $\pm$ ) **4**

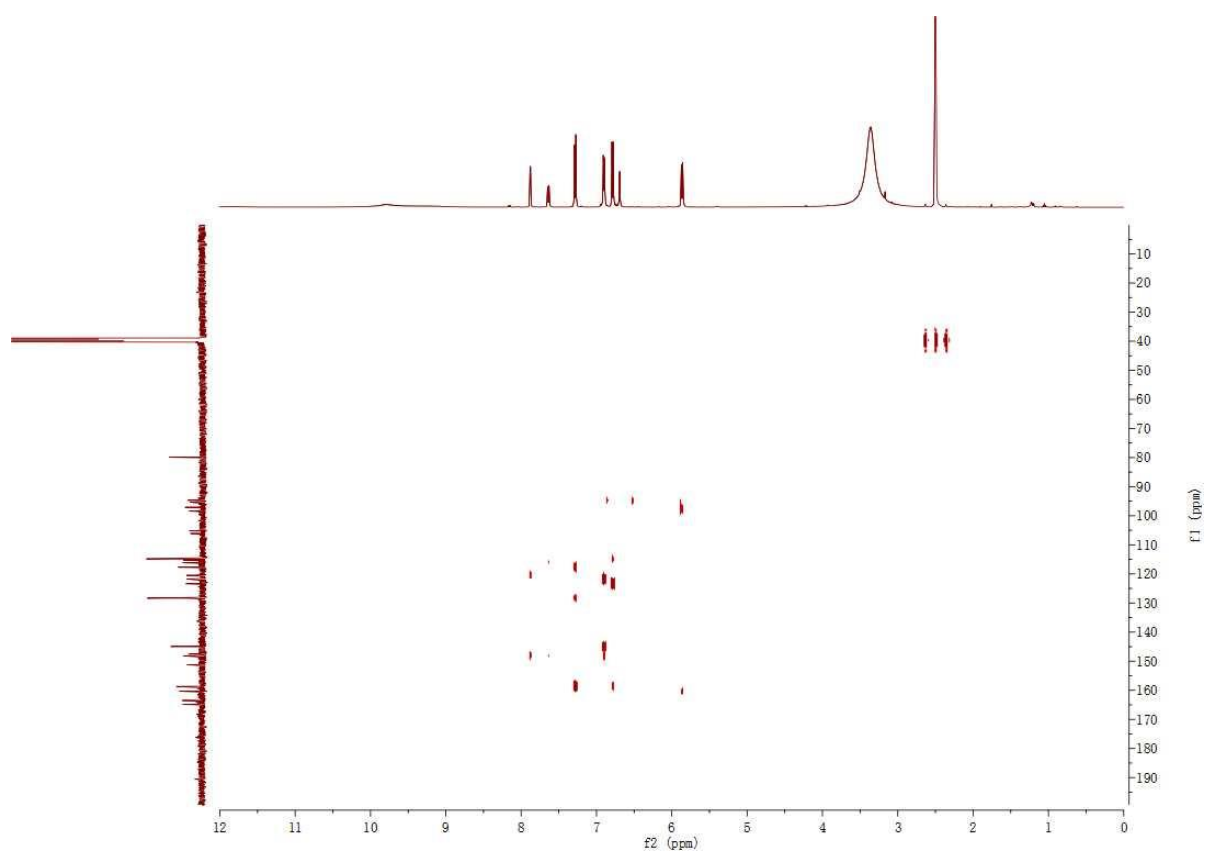

**Figure S31.** HMBC spectrum of ( $\pm$ ) **4**

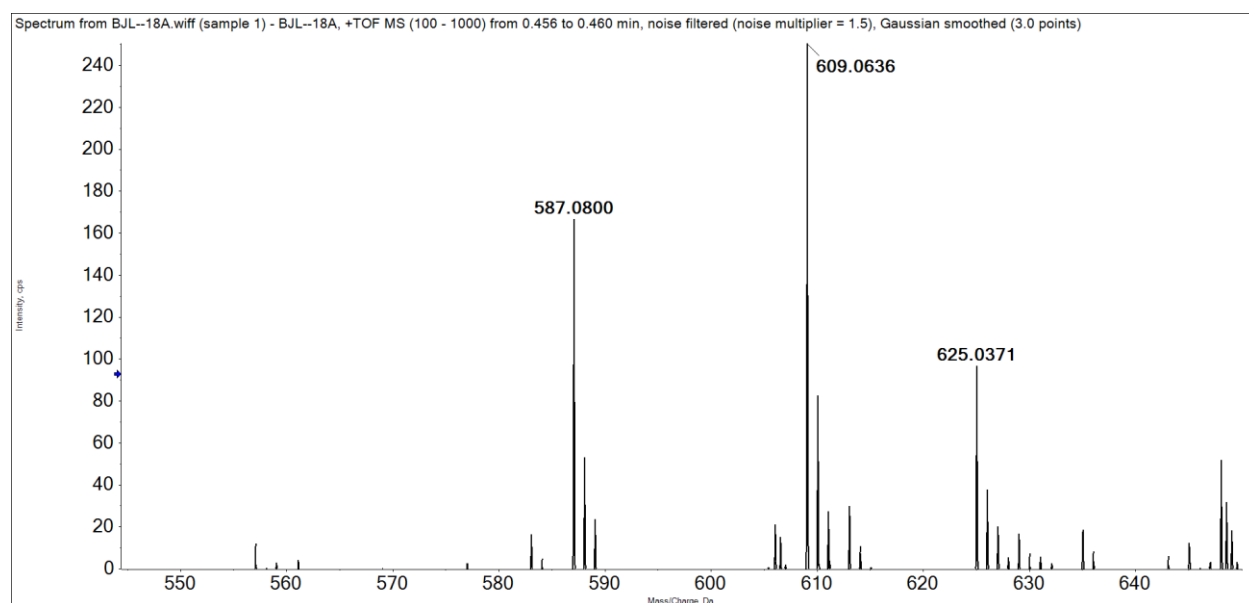

**Figure S32.** HR-ESI-MS spectrum of ( $\pm$ ) **4**

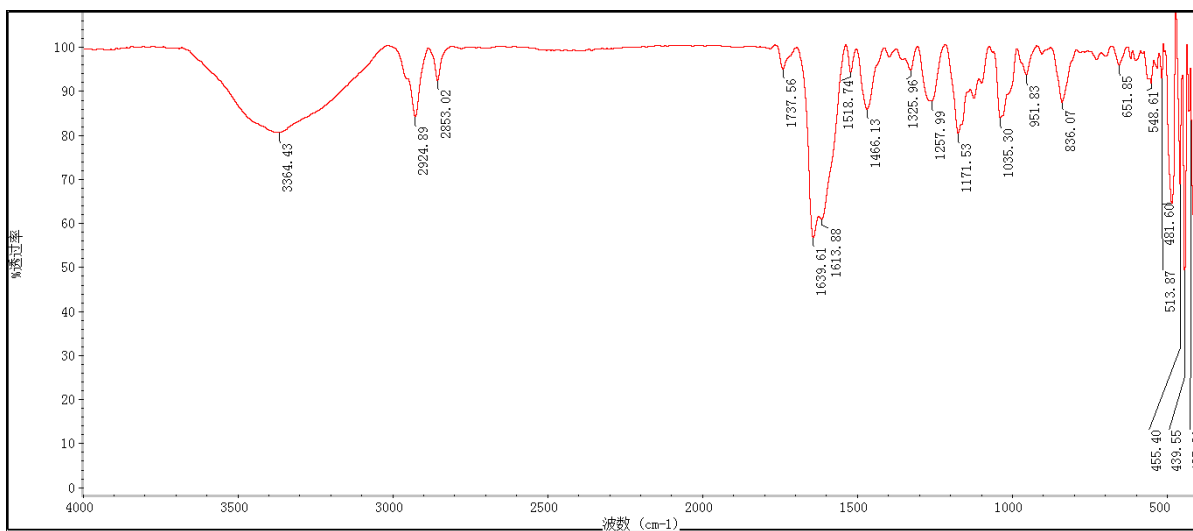

**Figure S33.** IR spectrum of ( $\pm$ ) **4**

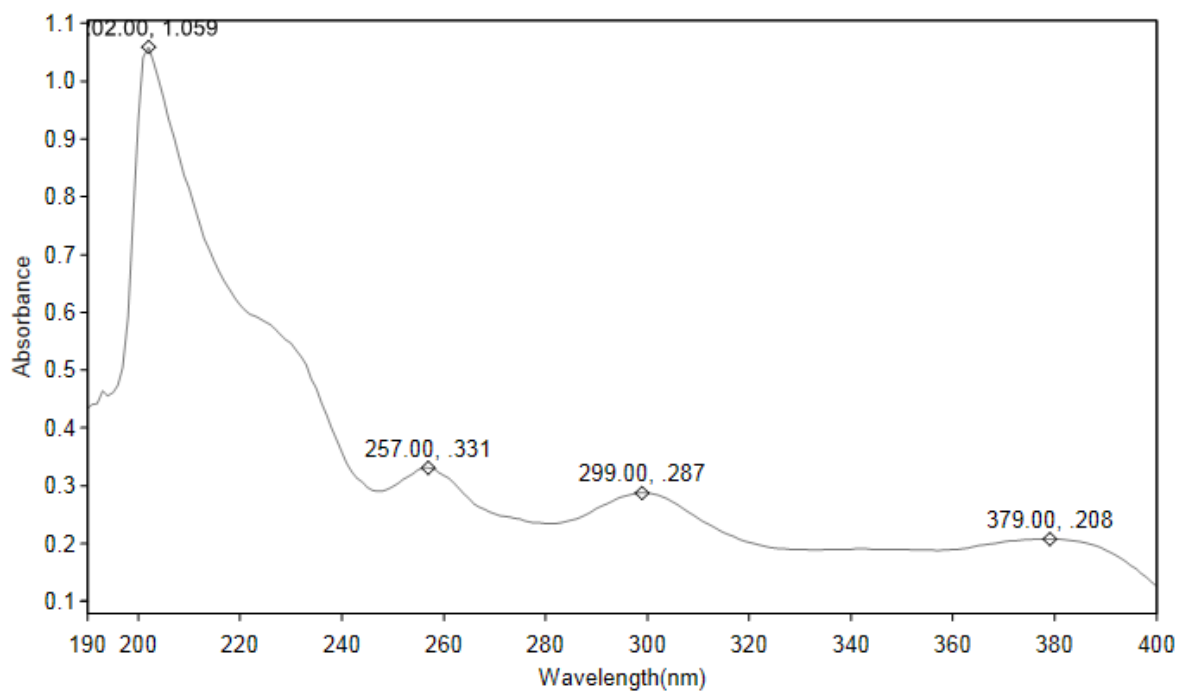

**Figure S34.** UV spectrum of ( $\pm$ ) **4**

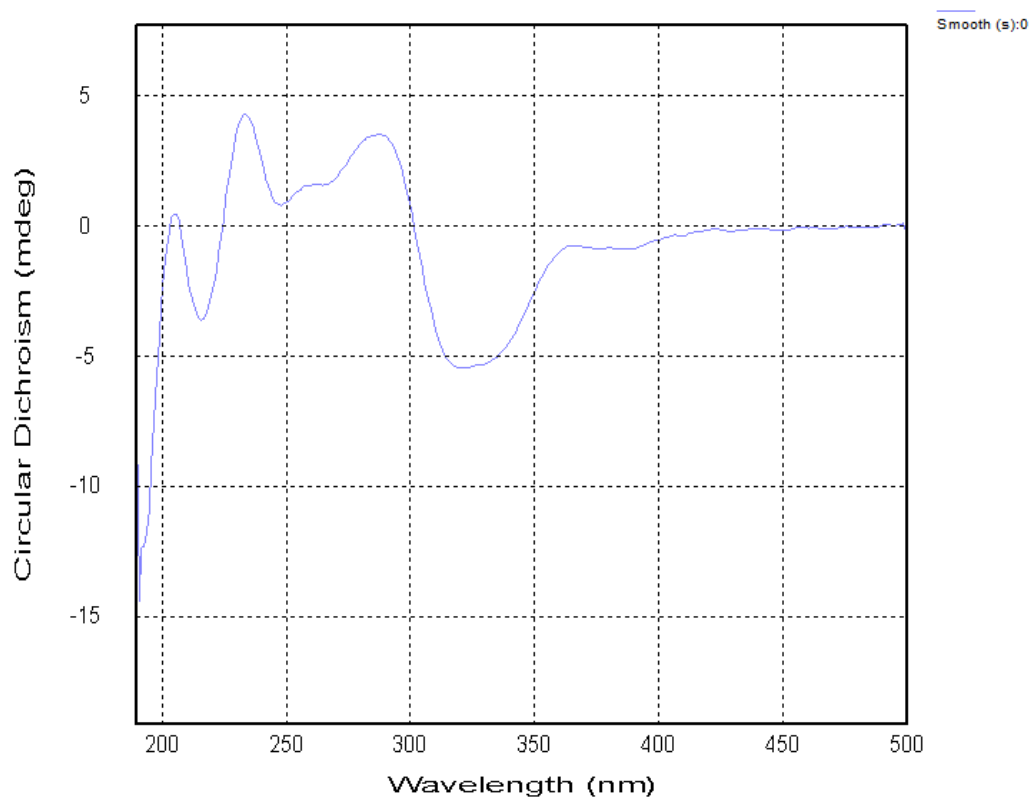

**Figure S35.** Experimental ECD spectrum of **4a**

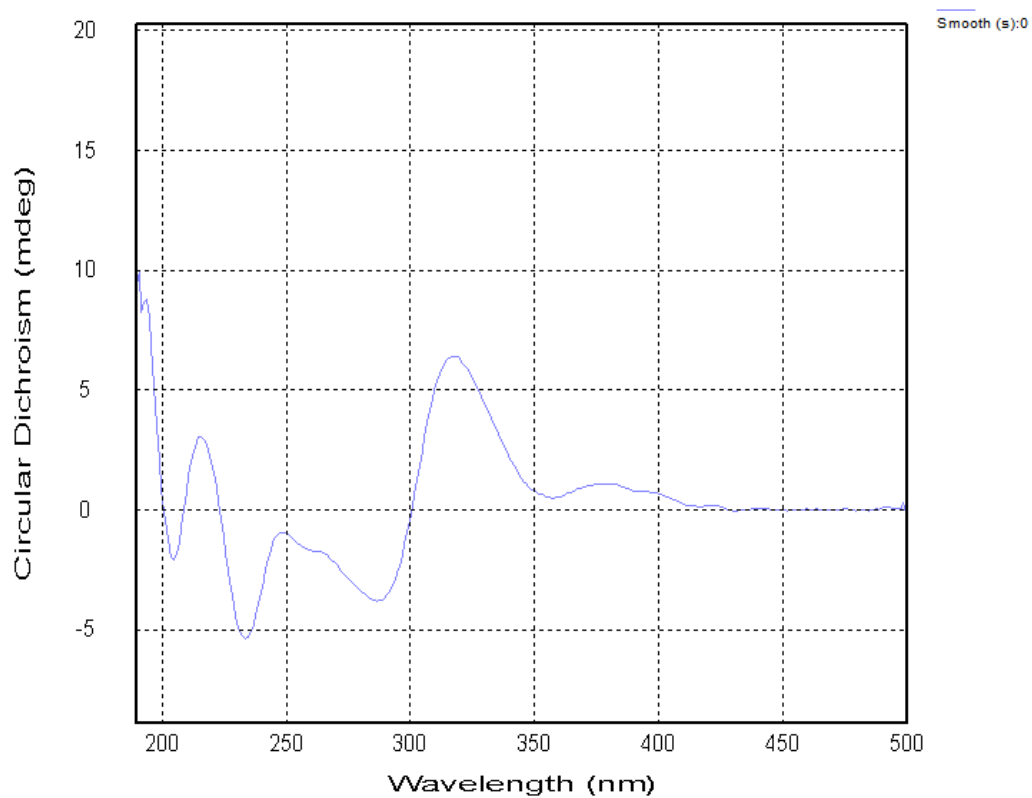

**Figure S36.** Experimental ECD spectrum of **4b**

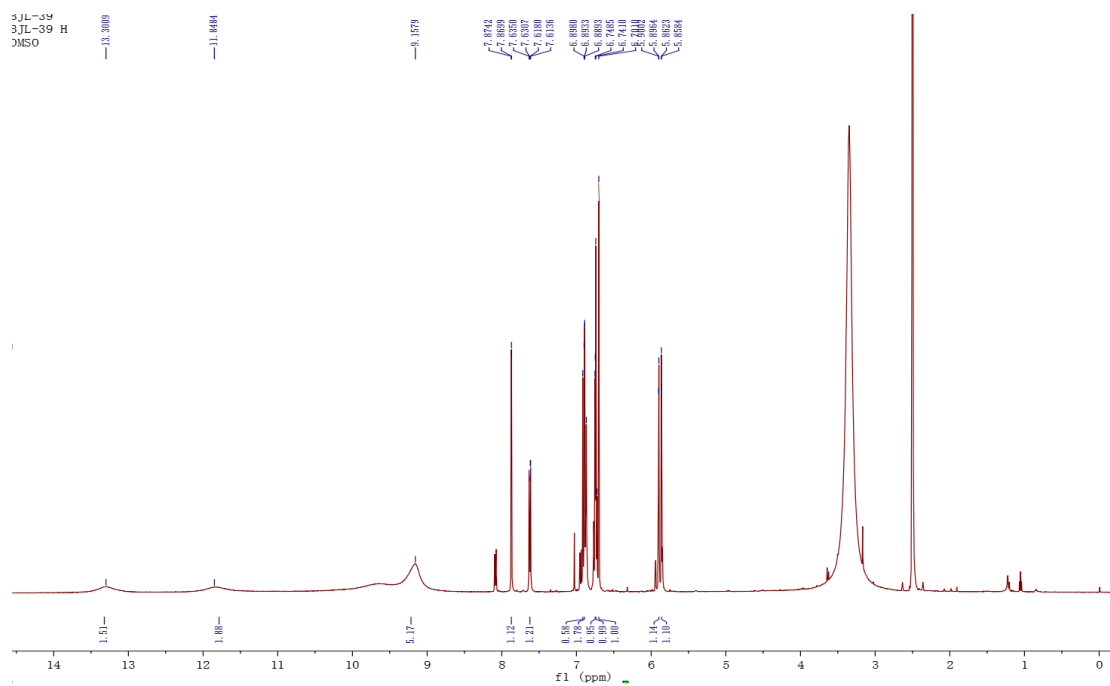

**Figure S37.**  $^1\text{H}$  NMR (500 MHz,  $\text{DMSO-}d_6$ ) spectrum of ( $\pm$ ) **5**

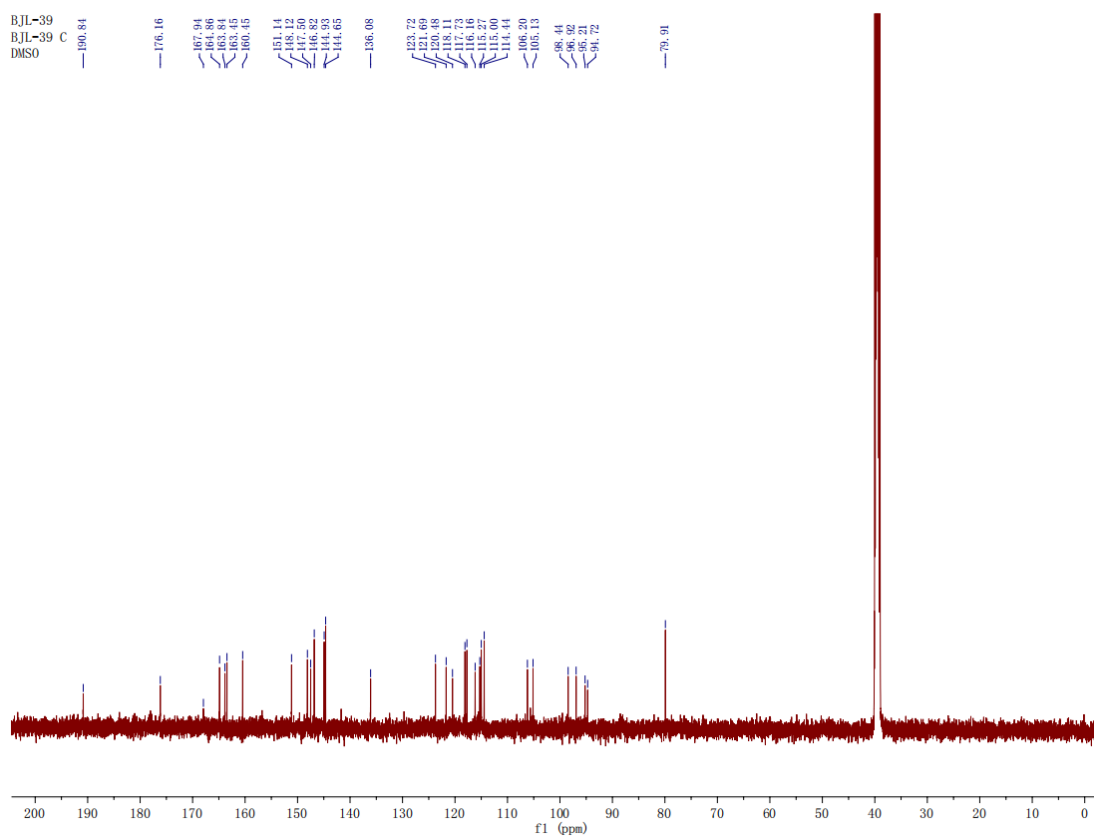

**Figure S38.**  $^{13}\text{C}$  NMR (125 MHz,  $\text{DMSO-}d_6$ ) spectrum of ( $\pm$ ) **5**

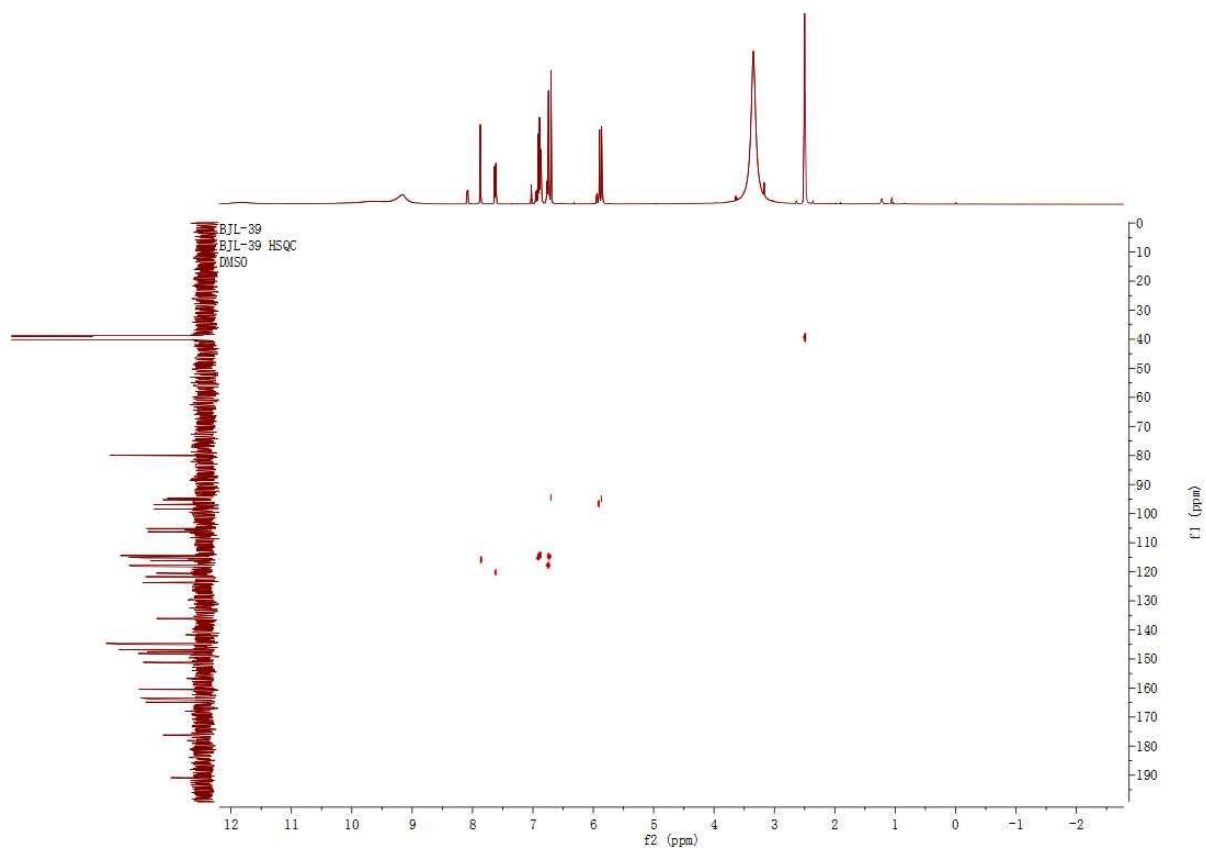

Figure S39. HSQC spectrum of ( $\pm$ ) 5

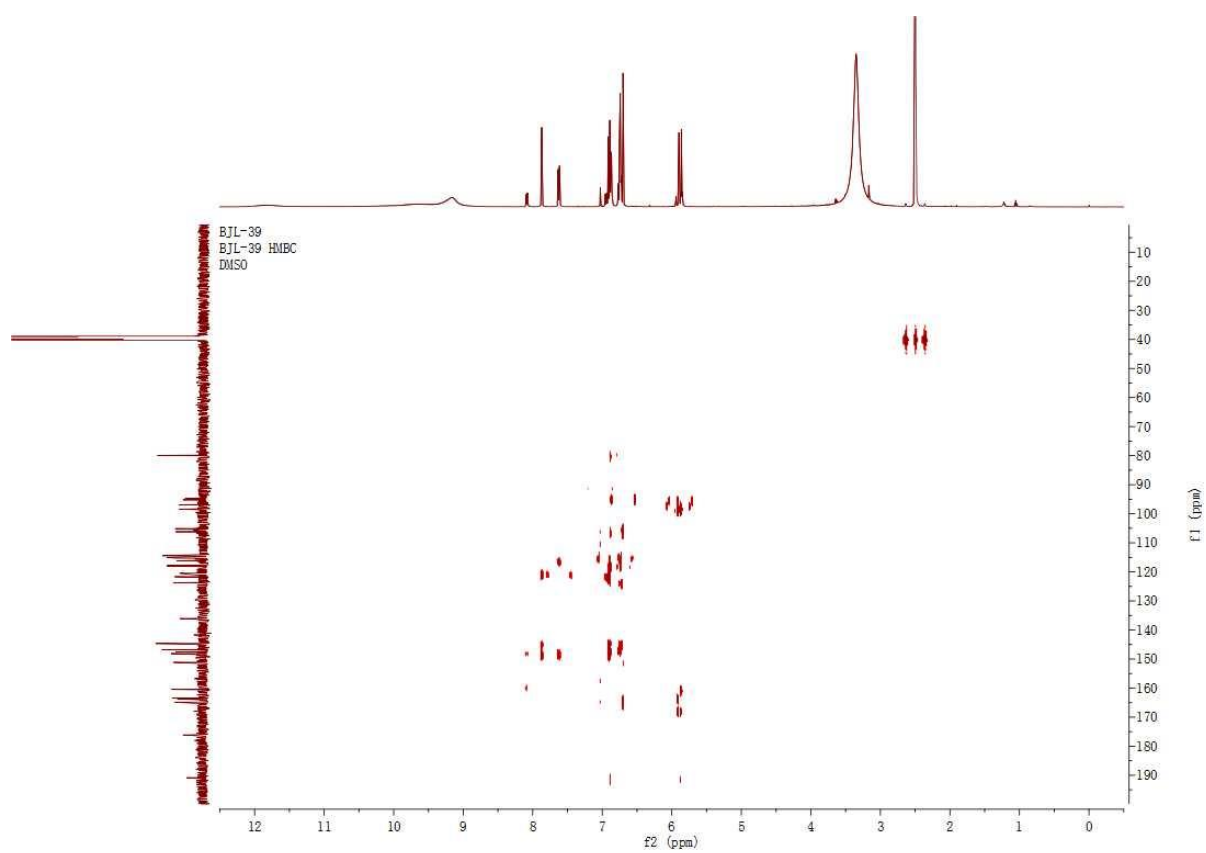

Figure S40. HMBC spectrum of ( $\pm$ ) 5

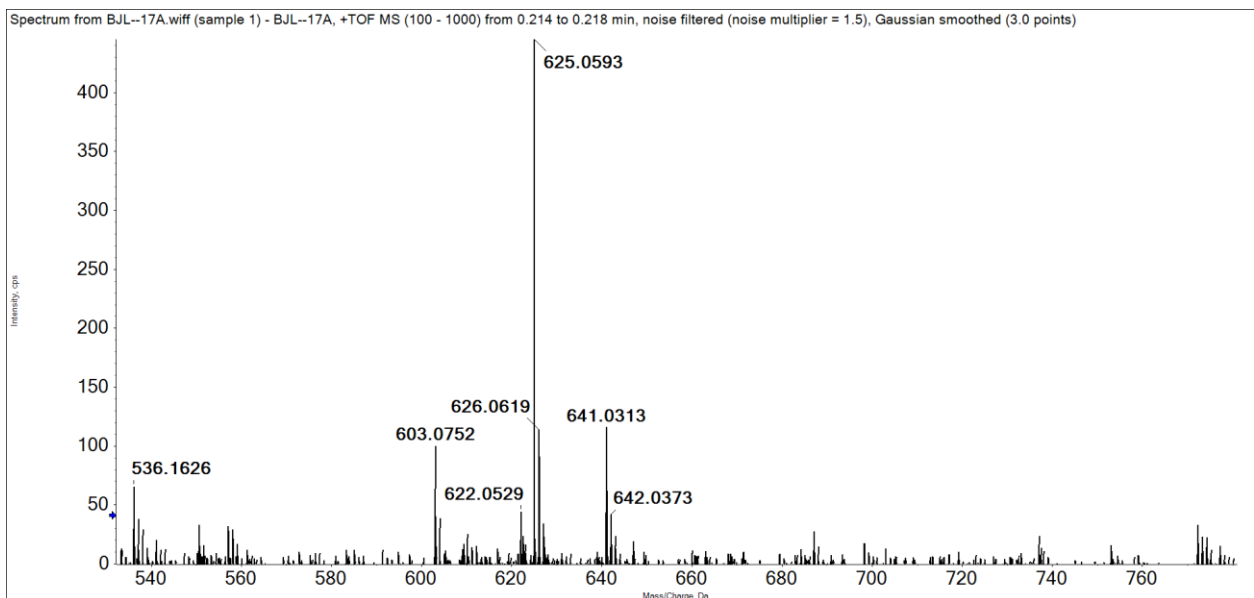

**Figure S41. HRESIMS spectrum of ( $\pm$ ) 5**

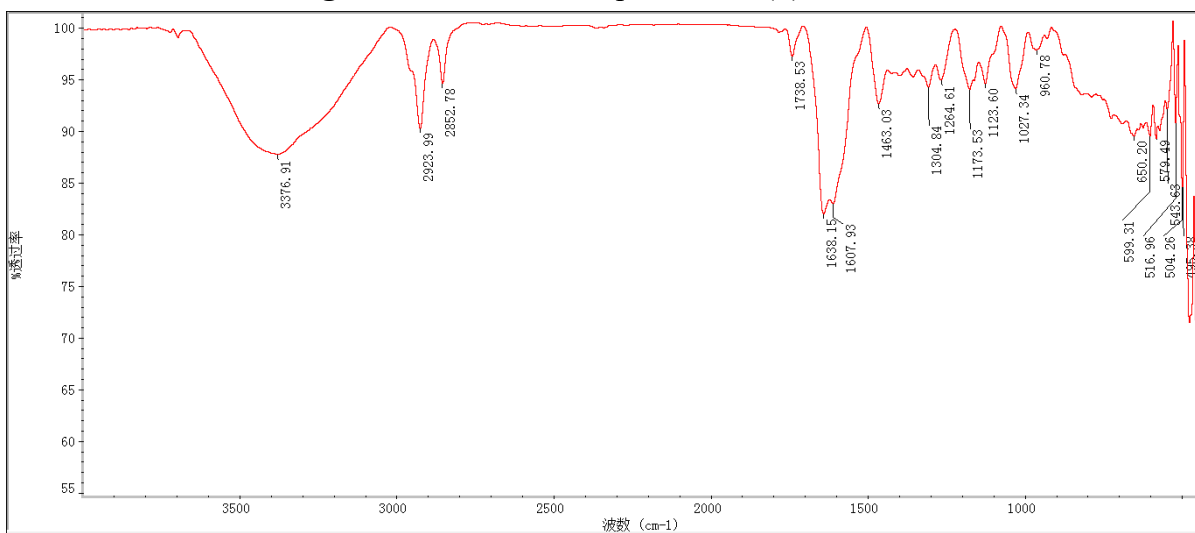

**Figure S42. IR spectrum of ( $\pm$ ) 5**



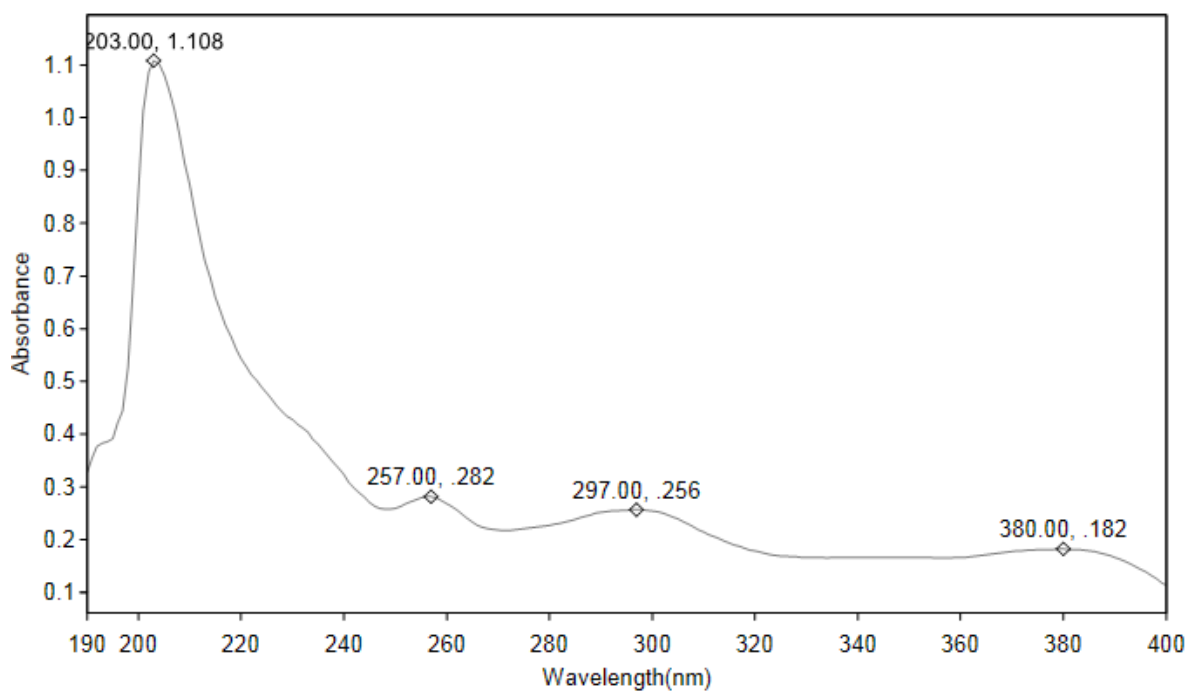

**Figure S43.** UV spectrum of (±) **5**

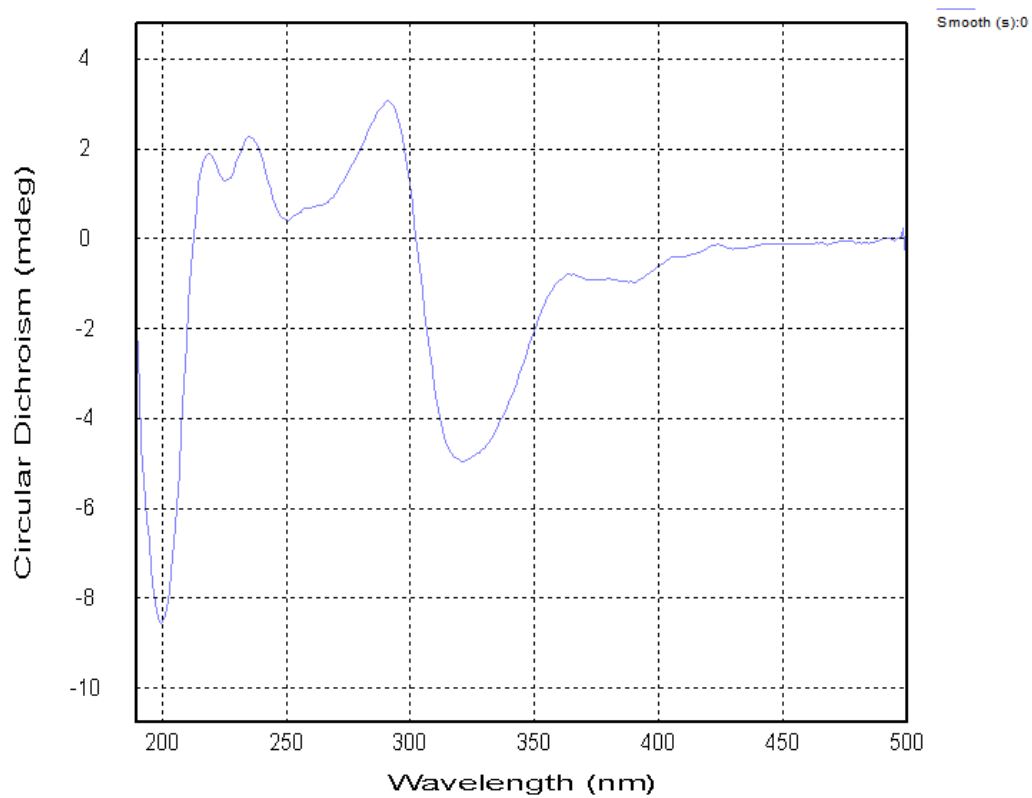

**Figure S44.** Experimental ECD spectrum of **5a**

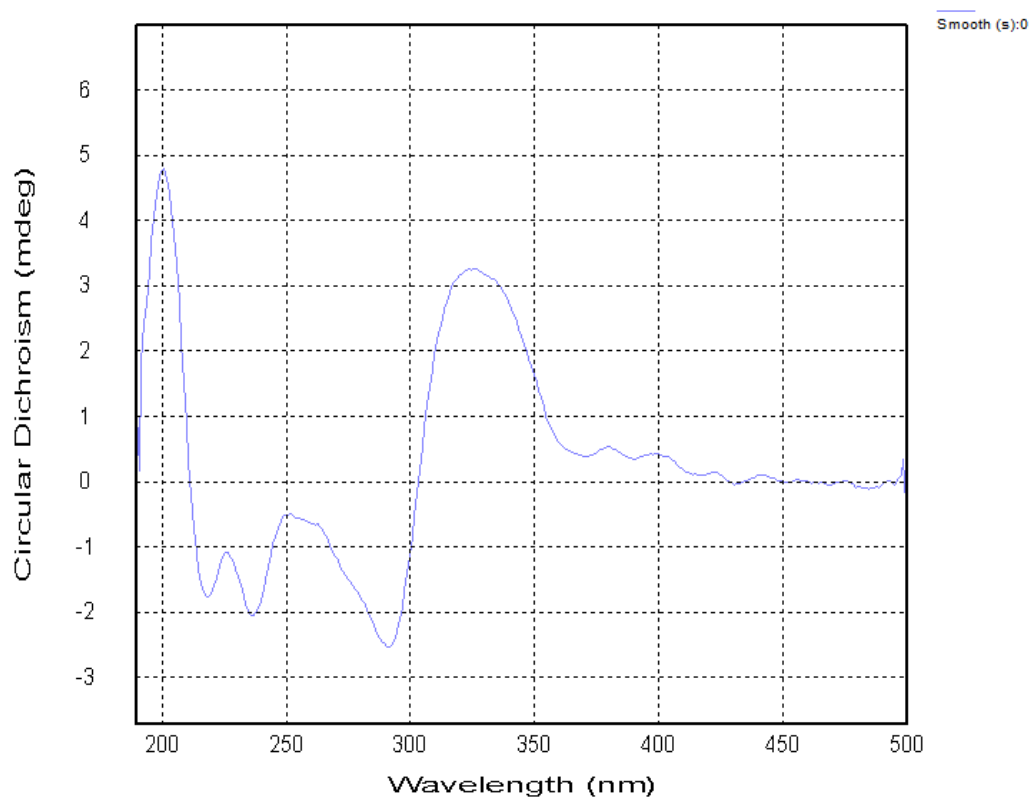

**Figure S45.** Experimental ECD spectrum of **5b**

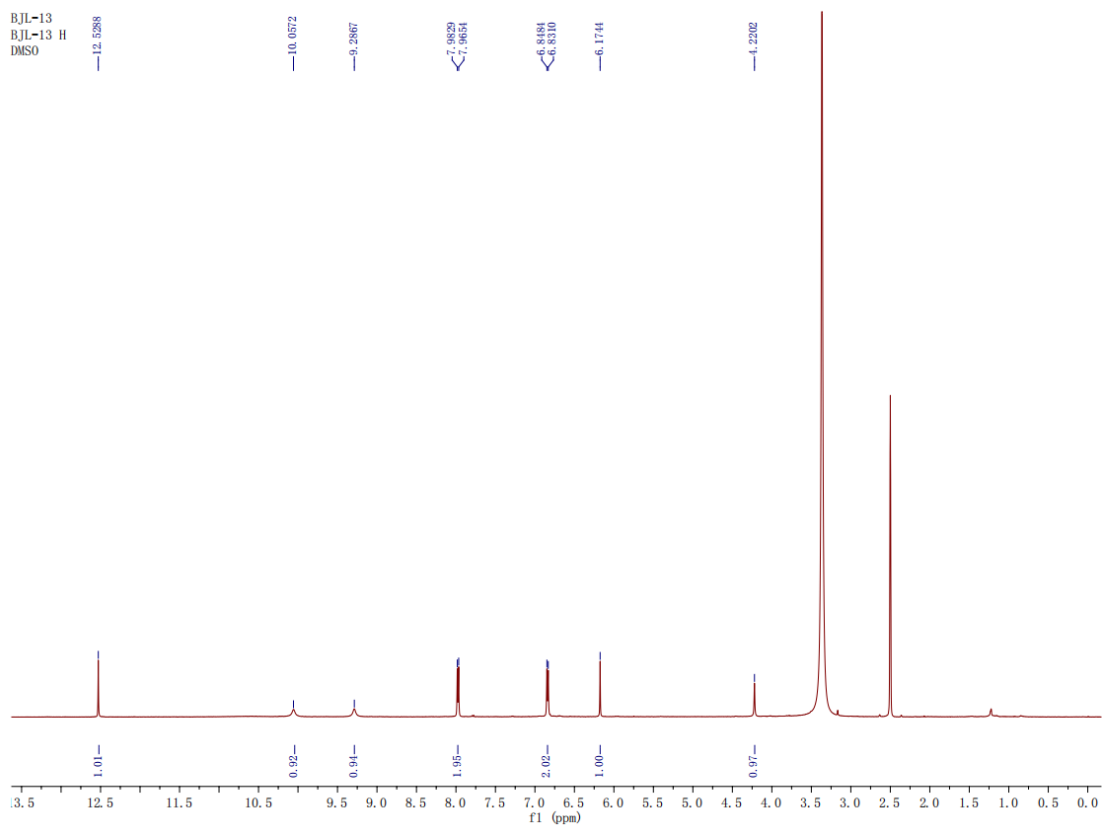

**Figure S46.**  $^1\text{H}$  NMR (500 MHz,  $\text{DMSO-}d_6$ ) spectrum of **6**

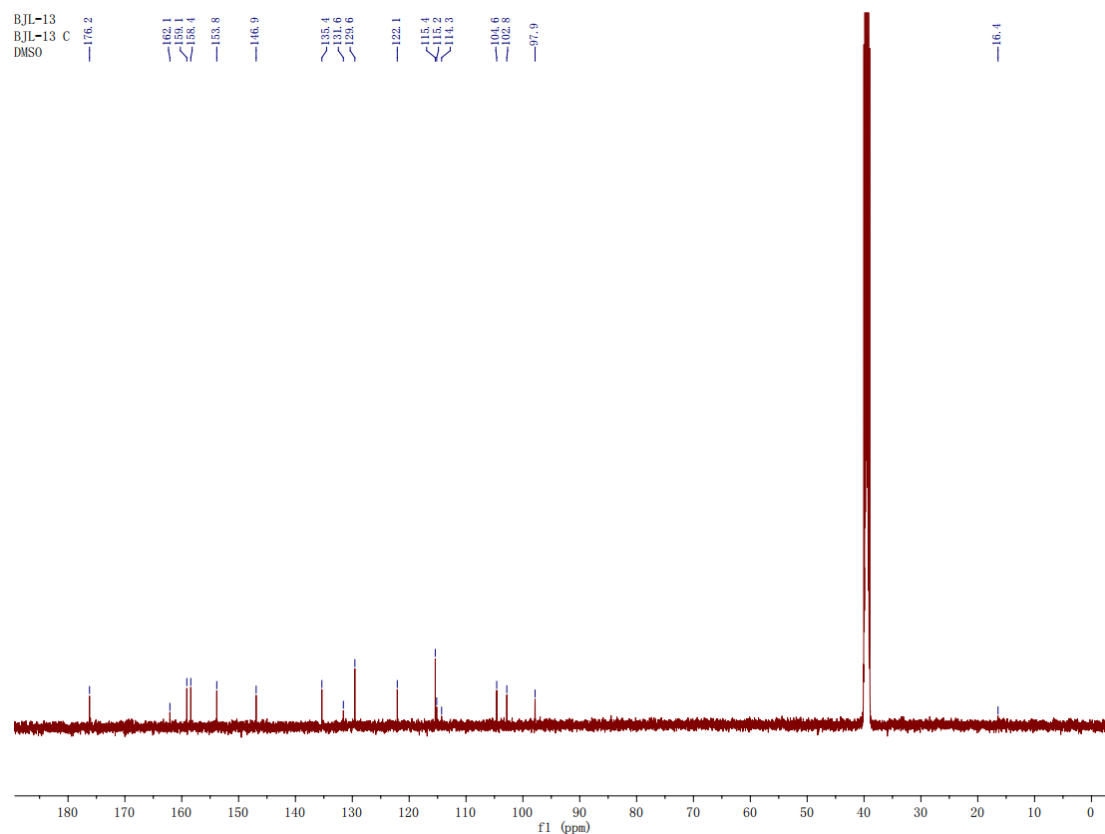

Figure S47.  $^{13}\text{C}$  NMR (125 MHz,  $\text{DMSO-}d_6$ ) spectrum of **6**

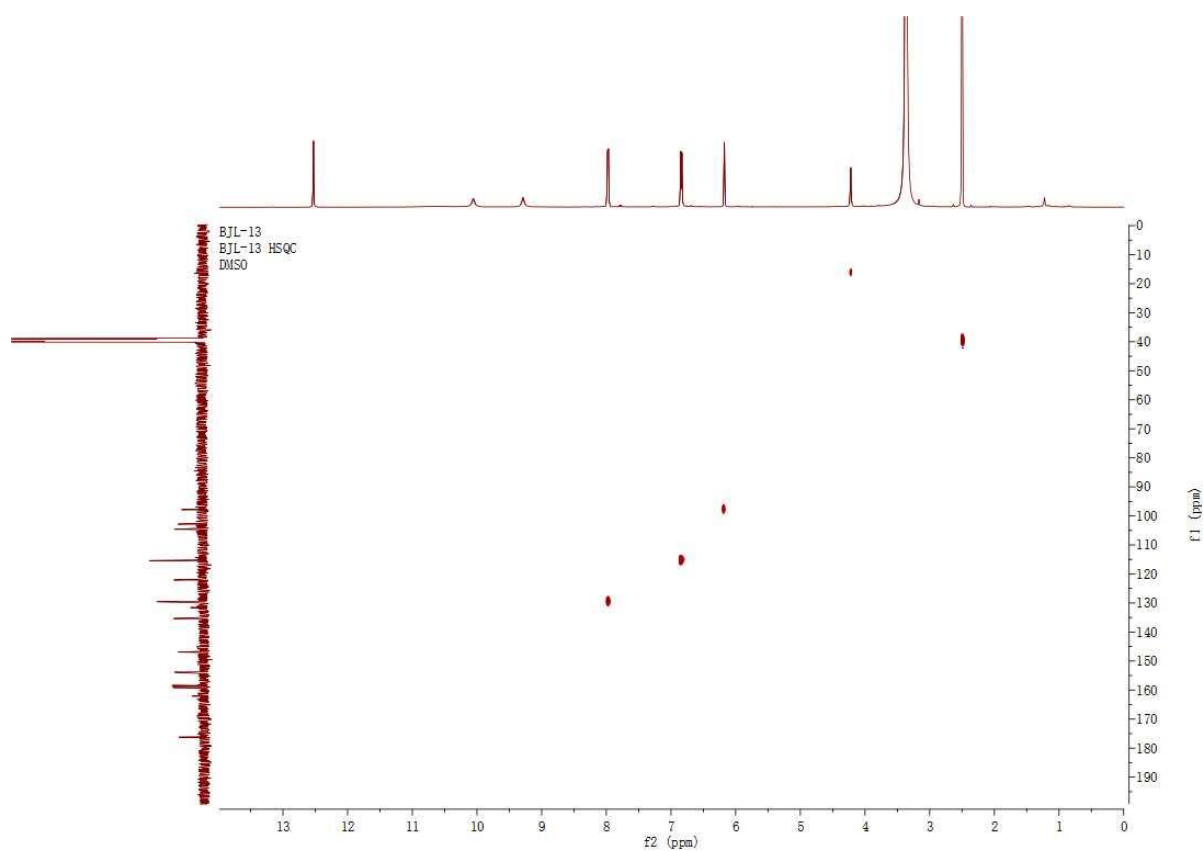

Figure S48. HSQC spectrum of **6**

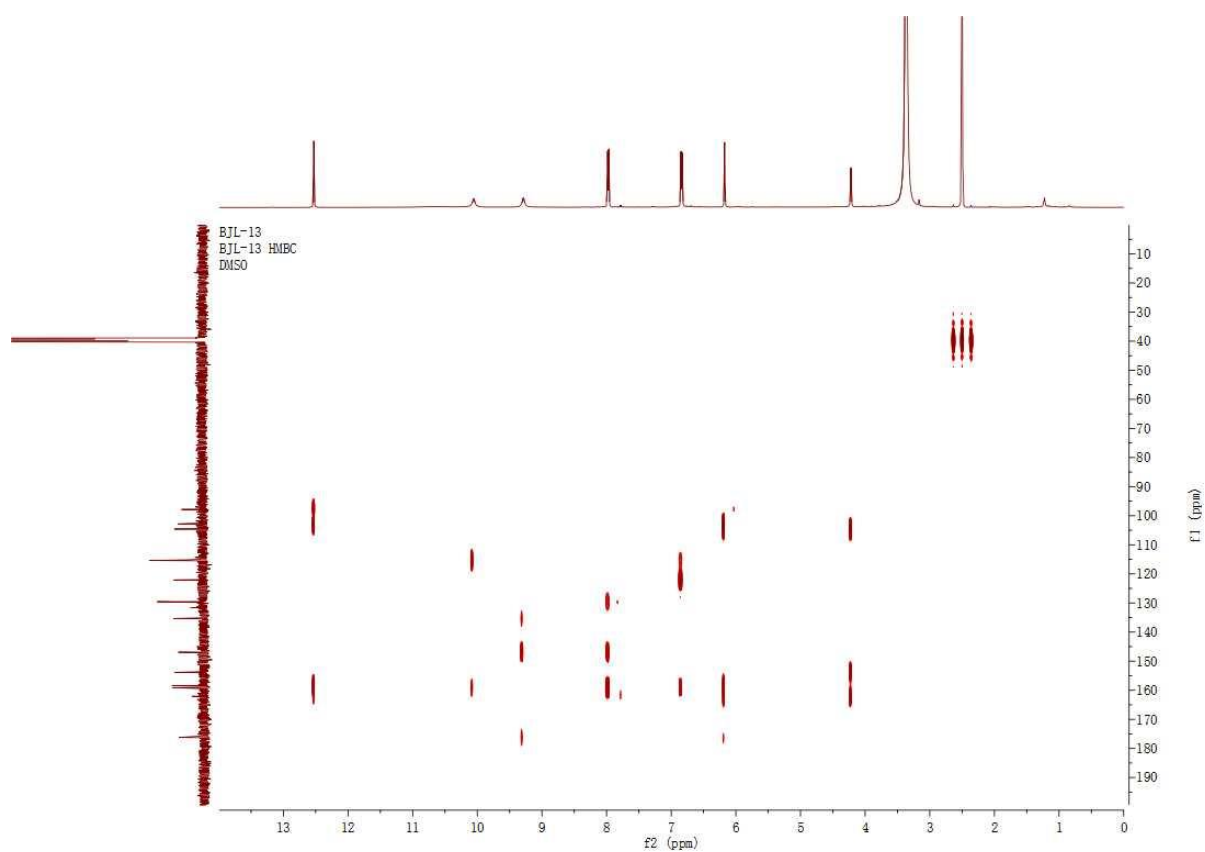

**Figure S49.** HMBC spectrum of **6**

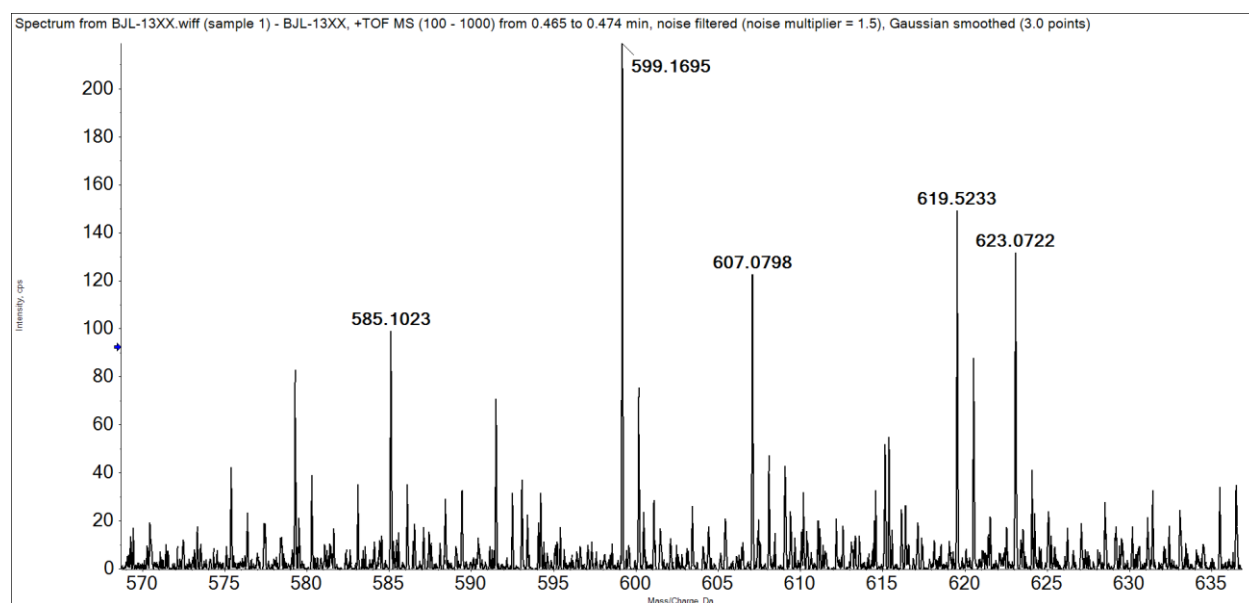

**Figure S50.** HRESIMS spectrum of **6**

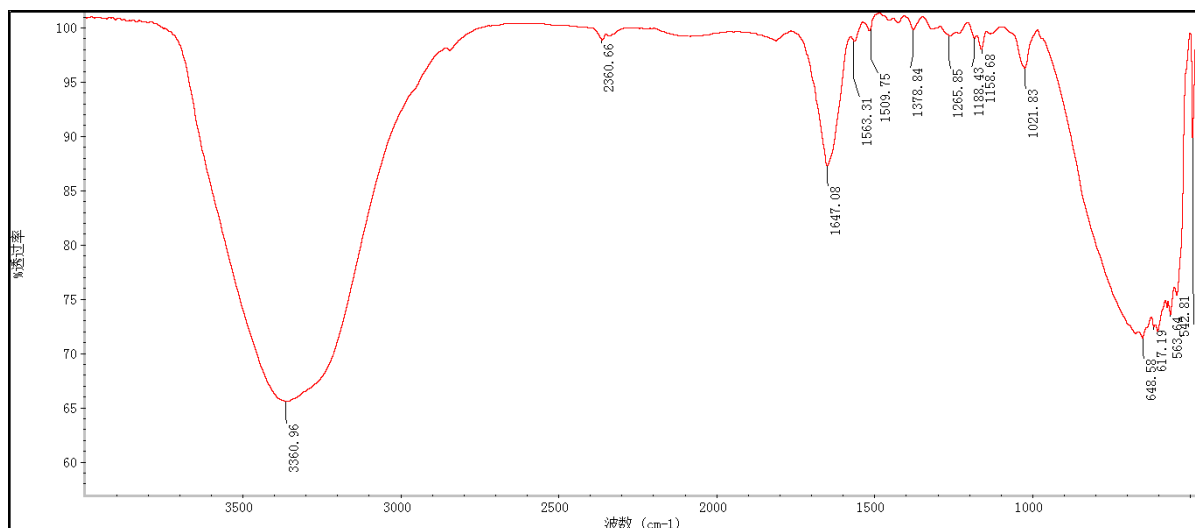

Figure S51. IR spectrum of 6

Scan Graph

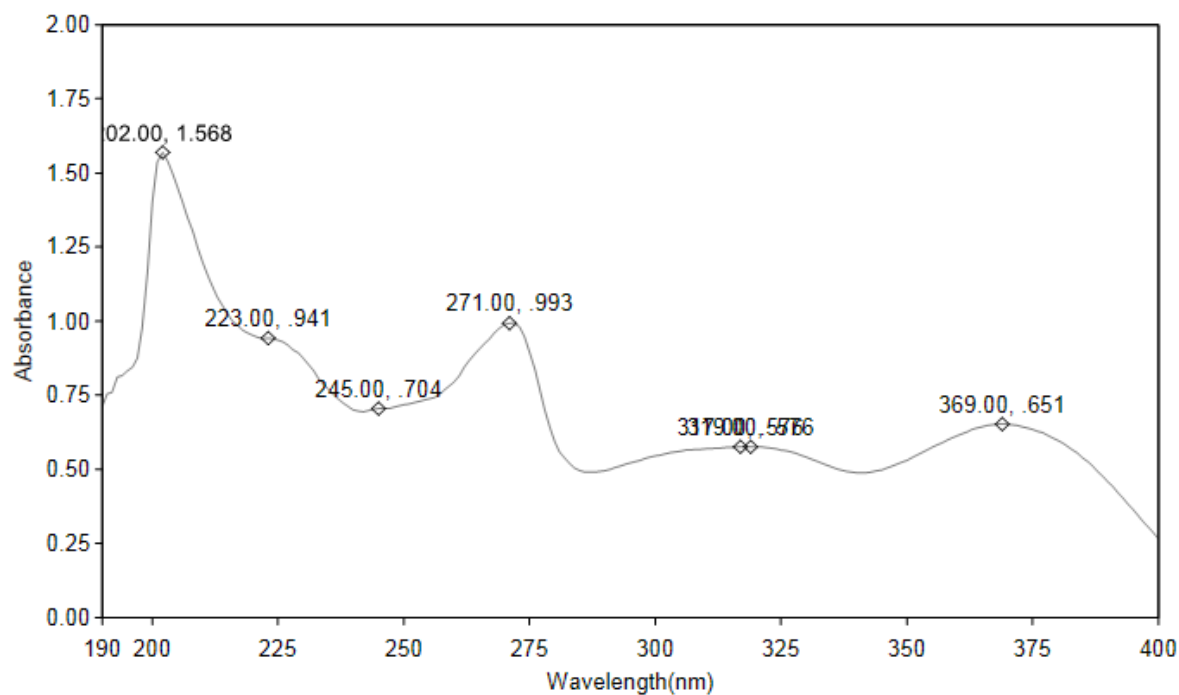

Figure S52. UV spectrum of 6

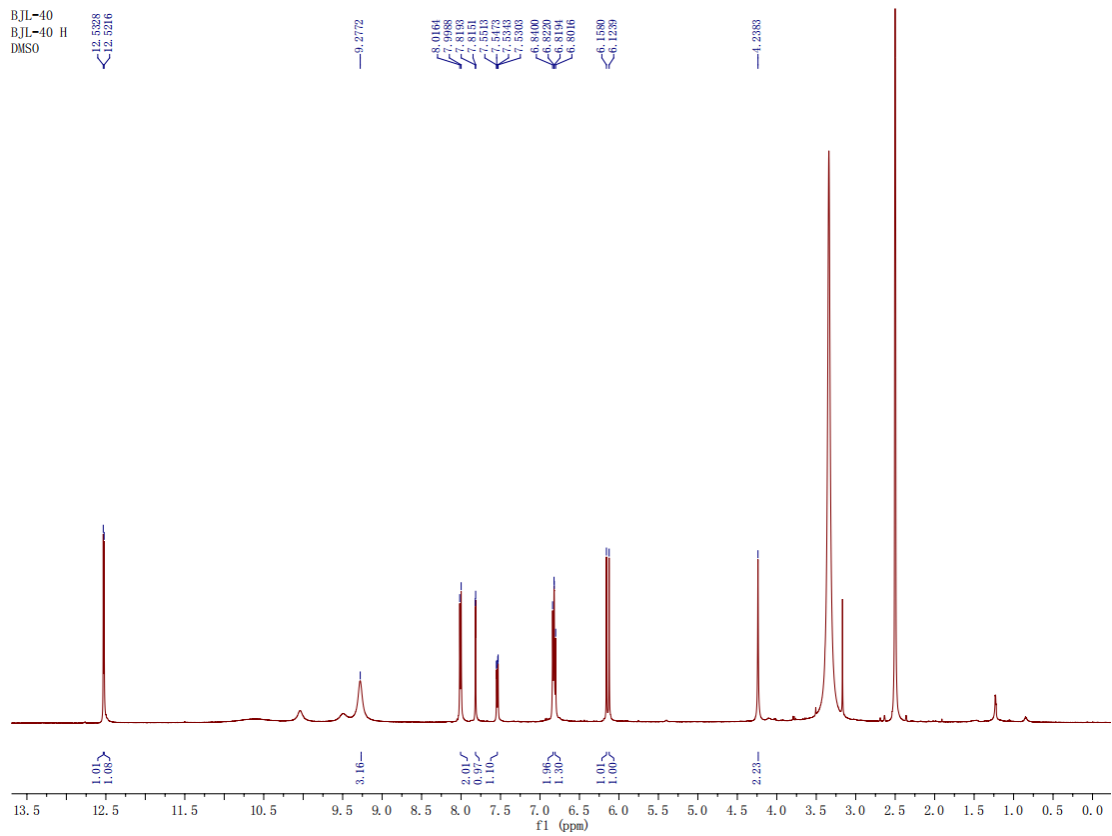

**Figure S53.**  $^1\text{H}$  NMR (500 MHz,  $\text{DMSO-}d_6$ ) spectrum of **7**

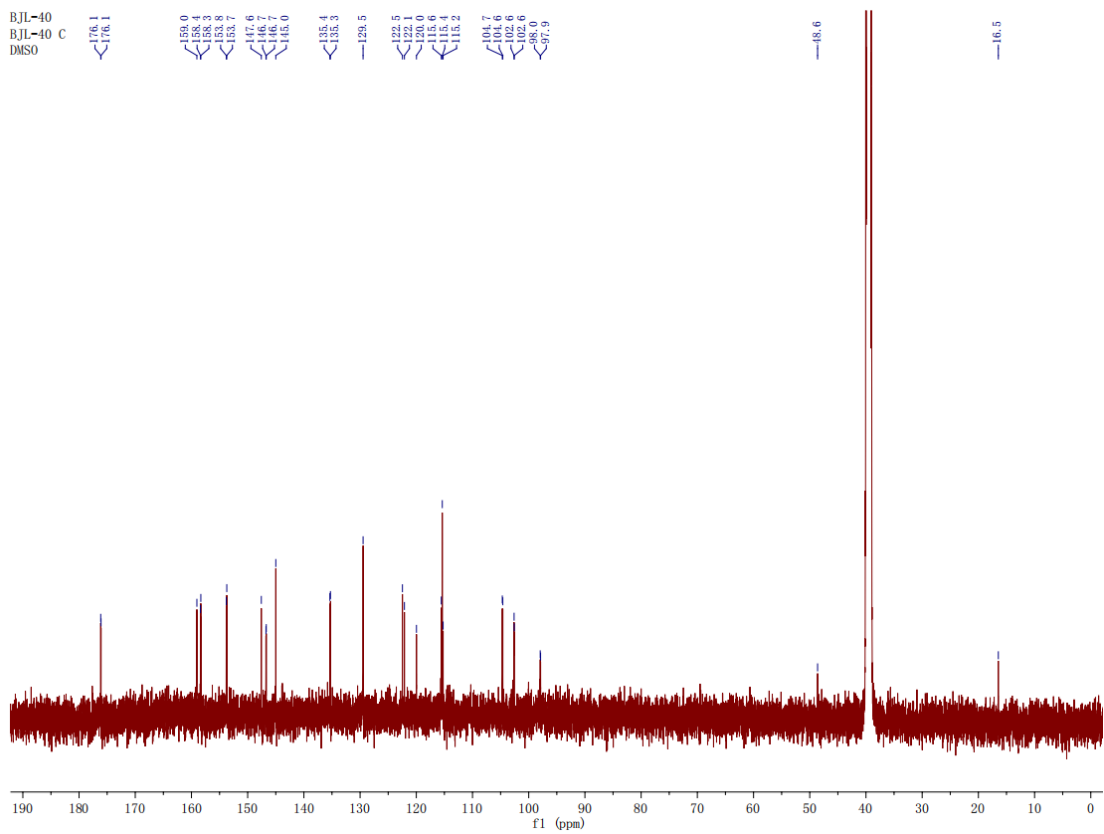

**Figure S54.**  $^{13}\text{C}$  NMR (125 MHz,  $\text{DMSO-}d_6$ ) spectrum of **7**

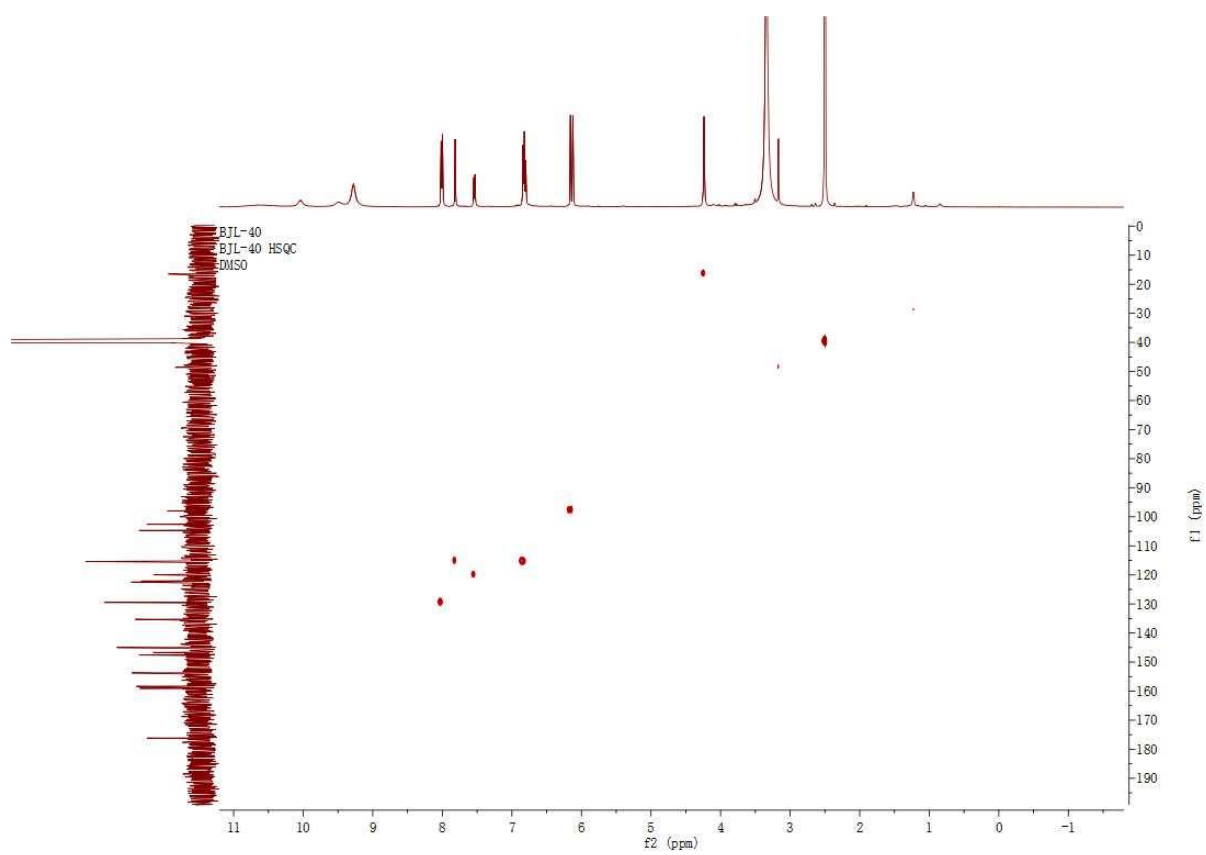

**Figure S55.** HSQC spectrum of **7**

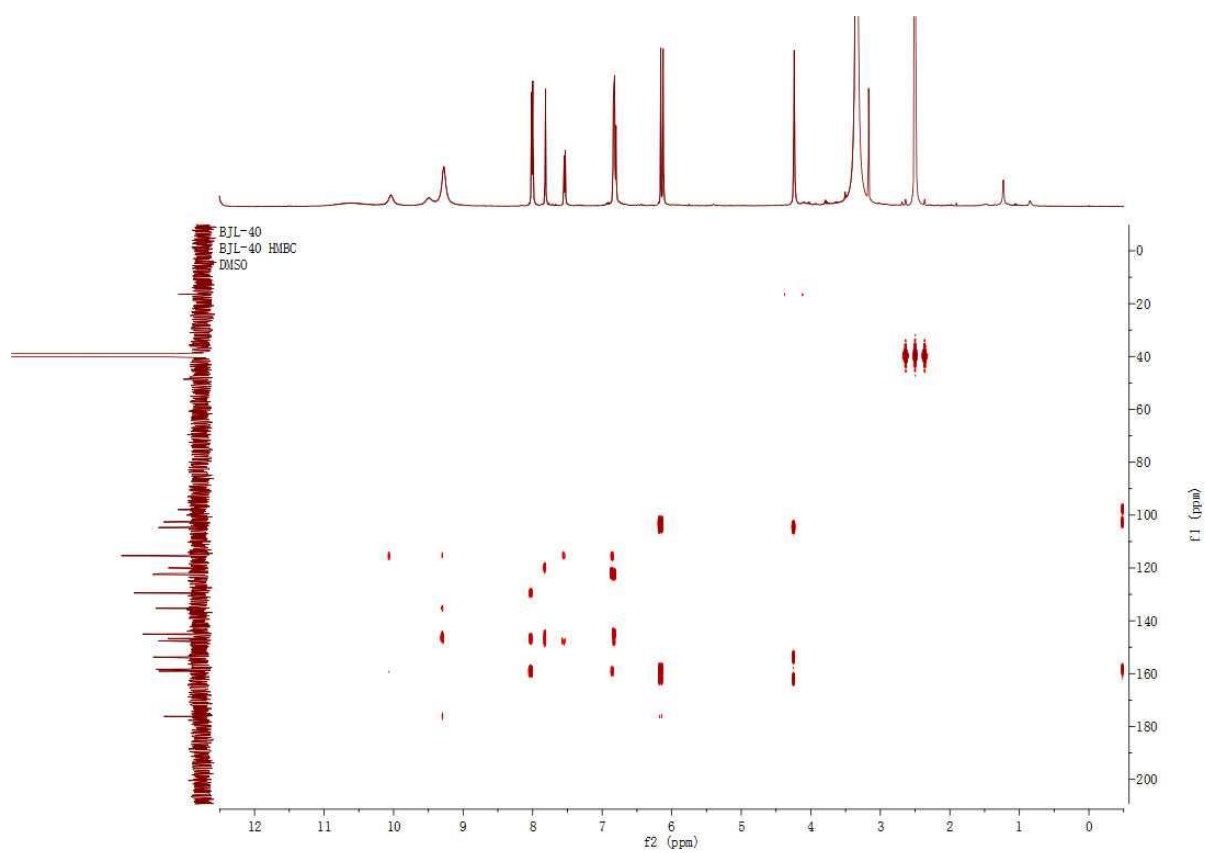

**Figure S56.** HMBC spectrum of **7**

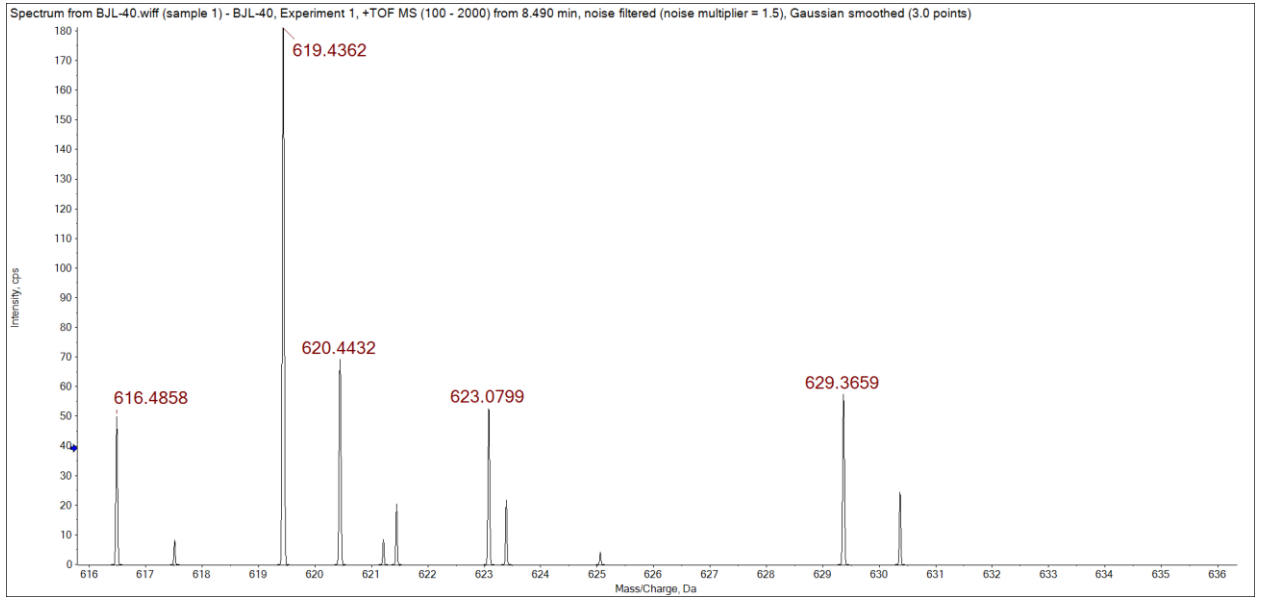

Figure S57. HRESIMS spectrum of 7

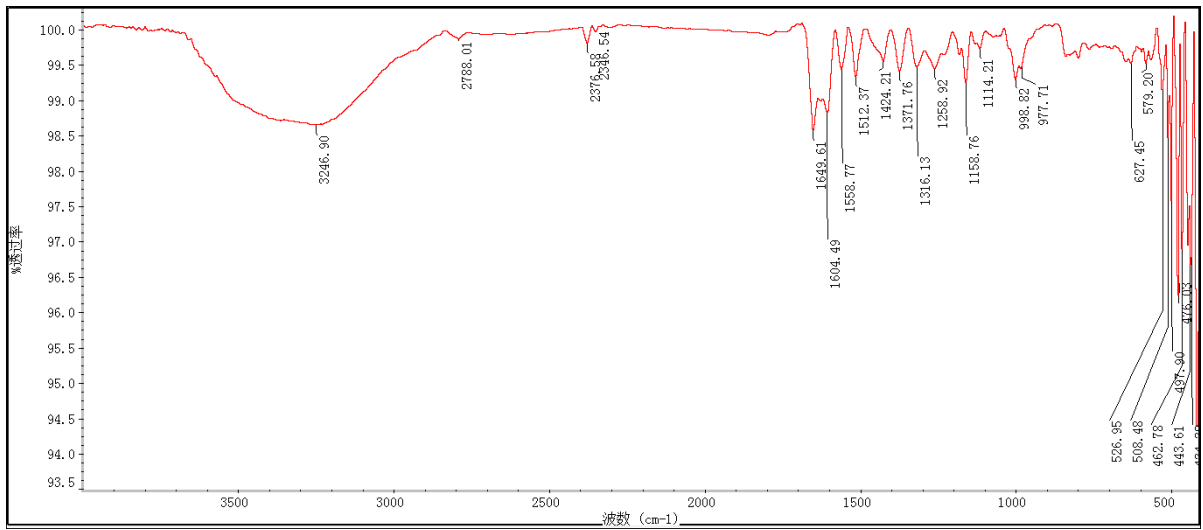

Figure S58. IR spectrum of 7



Scan Graph

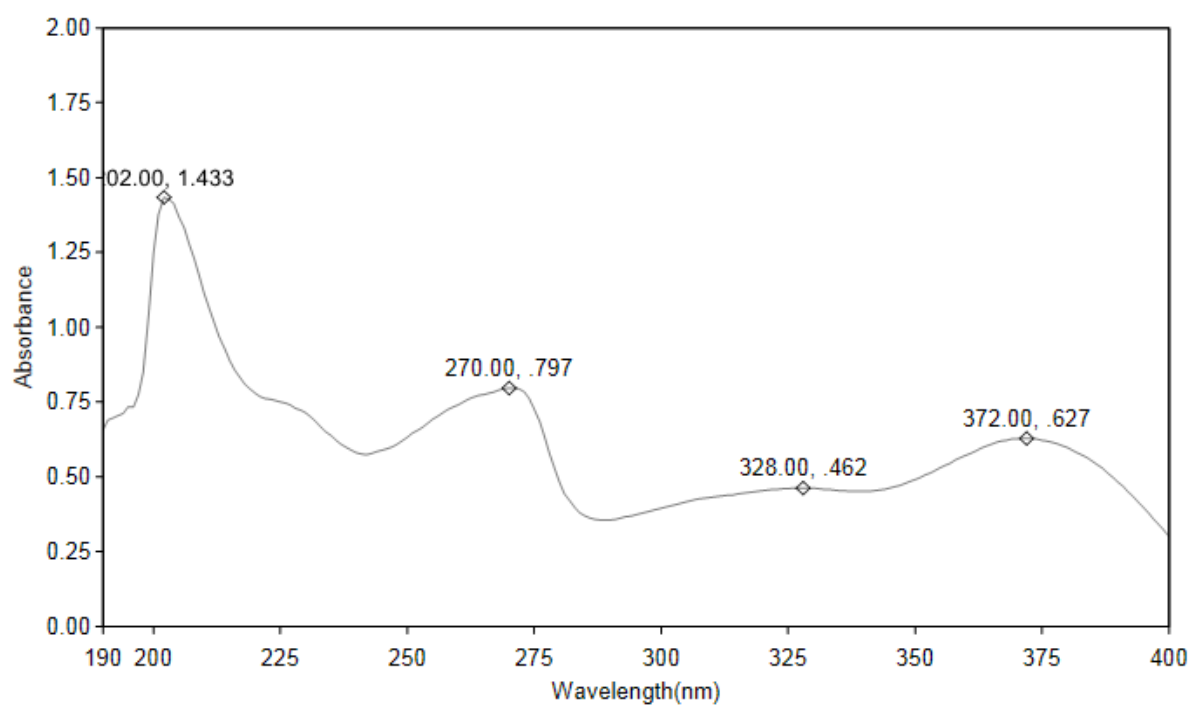

Figure S59. UV spectrum of 7
